# Supplementary material for: Synthetic control methodology as a tool for evaluating population-level health interventions
Source: PubMed Central journal article supplement (PMC6204967; doi:10.1136/jech-2017-210106), 2018-04-13
Supplement: jech-2017-210106supp001.pdf [file jech-2017-210106supp001.pdf]

**Supplementary Materials 1 Details of literature search**

|                                                          | Result<br>of search | Experimental' science<br>studies excluded | Potentially<br>relevant studies | Duplicates<br>excluded | Abstracts<br>screened | Reviewed for basic<br>information | Reviewed<br>in full | Of which<br>related to<br>health |
|----------------------------------------------------------|---------------------|-------------------------------------------|---------------------------------|------------------------|-----------------------|-----------------------------------|---------------------|----------------------------------|
| <b>Database searched</b>                                 |                     |                                           |                                 |                        |                       |                                   |                     |                                  |
| Proquest                                                 | 36                  | 0                                         | 36                              | 17                     | 19                    | 17                                | 2                   | 0                                |
| Repec (Research Papers in Economics)                     | 111                 | 0                                         | 111                             | 68                     | 43                    | 35                                | 8                   | 7                                |
| Econlit                                                  | 49                  | 0                                         | 49                              | 21                     | 28                    | 21                                | 7                   | 3                                |
| Ovid Medline                                             | 34                  | 28                                        | 6                               | 5                      | 1                     | 0                                 | 1                   | 1                                |
| Embase 1947-Present                                      | 5                   | 1                                         | 4                               | 4                      | 0                     | 0                                 | 0                   | 0                                |
| Pubmed                                                   | 26                  | 0                                         | 26                              | 21                     | 5                     | 4                                 | 1                   | 1                                |
| ASSIA (American Psychological Association)               | 6                   | 0                                         | 6                               | 4                      | 2                     | 0                                 | 2                   | 2                                |
| SocIndex                                                 | 9                   | 0                                         | 9                               | 9                      | 0                     | 0                                 | 0                   | 0                                |
| Sociological Abstracts                                   | 3                   | 0                                         | 3                               | 1                      | 2                     | 1                                 | 1                   | 1                                |
| TRIP                                                     | 7                   | 1                                         | 6                               | 5                      | 1                     | 1                                 | 0                   | 0                                |
| CINAHL (Cumulative Index to Nursing and Allied Health)   | 3                   | 0                                         | 3                               | 2                      | 2                     | 1                                 | 1                   | 1                                |
| Psychinfo                                                | 11                  | 4                                         | 7                               | 5                      | 2                     | 1                                 | 1                   | 1                                |
| Business Source Premier                                  | 21                  | 0                                         | 21                              | 5                      | 16                    | 15                                | 1                   | 1                                |
| EBSCO Professional Development Collection                | 3                   | 0                                         | 3                               | 3                      | 0                     | 0                                 | 0                   | 0                                |
| ERIC (Institute of Education Sciences)                   | 0                   | 0                                         | 0                               | 0                      | 0                     | 0                                 | 0                   | 0                                |
| National Institute for Health and Care Excellence (NICE) | 7                   | 2                                         | 5                               | 5                      | 0                     | 0                                 | 0                   | 0                                |
| <b>Other sources</b>                                     |                     |                                           |                                 |                        |                       |                                   |                     |                                  |
| World Bank                                               | 1                   | 0                                         | 1                               | 1                      | 0                     | 0                                 | 0                   | 0                                |
| RAND corporation                                         | 1                   | 0                                         | 1                               | 0                      | 1                     | 0                                 | 1                   | 0                                |
| Citations of key articles                                | n/a                 | n/a                                       | n/a                             | n/a                    | 17                    | 11                                | 6                   | 4                                |
| Author searches                                          | n/a                 | n/a                                       | n/a                             | n/a                    | 2                     | 2                                 | 0                   | 0                                |
| References from studies reviewed                         | n/a                 | n/a                                       | n/a                             | n/a                    | 7                     | 3                                 | 7                   | 5                                |
| Google Scholar                                           | 318                 | 0                                         | 318                             | 250                    | 68                    | 53                                | 12                  | 10                               |
| What Works Scotland (note 1)                             | n/a                 | n/a                                       | n/a                             | n/a                    | 8                     | 6                                 | 2                   | 1                                |
| <b>Totals</b>                                            | <b>651</b>          | <b>36</b>                                 | <b>615</b>                      | <b>426</b>             | <b>224</b>            | <b>171</b>                        | <b>53</b>           | <b>38</b>                        |

**Notes**

1) Brief review of methodology published March 2015 - this review had access to some additional sources

2) For all searches except Google Scholar, Pubmed, Ovid Medline and Embase 1947-Present the search term used was "synthetic control\$" in the full text". The search term was narrowed to "synthetic control\$ method\$" for Google Scholar, Pubmed, Ovid Medline and Embase 1947 as a large number of experimental science papers were returned with the wider term.
