# Supplementary material for: Synthetic control methodology as a tool for evaluating population-level health interventions
Source: PubMed Central journal article supplement (PMC6204967; doi:10.1136/jech-2017-210106), 2018-04-13
Supplement: jech-2017-210106supp004.pdf [file jech-2017-210106supp004.pdf]

|       |      |       |          |          |      |         |         |        |          |             |           |
|-------|------|-------|----------|----------|------|---------|---------|--------|----------|-------------|-----------|
| 2 UK  | 1960 | 2158  |          | 43.25547 | 24.5 |         |         |        |          | United King | 71.04 UK  |
| 2 UK  | 1961 | 2216  | 3.579418 | 41.53324 |      |         |         |        |          | United King | 70.79 UK  |
| 2 UK  | 1962 | 2276  | 4.103672 | 40.40463 |      |         |         |        |          | United King | 70.85 UK  |
| 2 UK  | 1963 | 2386  | 2.074689 | 40.40659 |      |         |         |        |          | United King | 70.76 UK  |
| 2 UK  | 1964 | 2534  | 3.211382 | 40.51876 |      |         |         |        |          | United King | 71.55 UK  |
| 2 UK  | 1965 | 2660  | 4.805041 | 39.22534 | 26.5 |         |         |        |          | United King | 71.52 UK  |
| 2 UK  | 1966 | 2794  | 3.908305 | 38.96463 |      |         |         |        |          | United King | 71.44 UK  |
| 2 UK  | 1967 | 2923  | 2.423146 | 39.31319 |      |         |         |        |          | United King | 72.07 UK  |
| 2 UK  | 1968 | 3173  | 4.731638 | 43.66513 |      |         |         |        |          | United King | 71.69 UK  |
| 2 UK  | 1969 | 3391  | 5.461902 | 44.03898 |      |         |         |        |          | United King | 71.66 UK  |
| 2 UK  | 1970 | 3615  | 6.361893 | 45.24774 | 28.9 |         |         |        |          | United King | 71.9 UK   |
| 2 UK  | 1971 | 3854  | 9.407875 | 44.9334  |      |         |         |        | 43.07859 | United King | 72.23 UK  |
| 2 UK  | 1972 | 4149  | 7.087912 | 43.55904 |      |         |         |        | 42.56008 | United King | 72 UK     |
| 2 UK  | 1973 | 4683  | 9.209851 | 49.80358 |      |         |         |        | 42.1354  | United King | 72.19 UK  |
| 2 UK  | 1974 | 5036  | 15.90322 | 60.96212 |      |         |         |        | 41.62375 | United King | 72.38 UK  |
| 2 UK  | 1975 | 5481  | 24.23508 | 53.56206 | 31   |         |         |        | 40.48818 | United King | 72.65 UK  |
| 2 UK  | 1976 | 5953  | 16.53255 | 58.16979 |      |         |         |        | 41.08992 | United King | 72.64 UK  |
| 2 UK  | 1977 | 6489  | 15.88198 | 59.42042 |      |         |         |        | 41.33041 | United King | 73.12 UK  |
| 2 UK  | 1978 | 7176  | 8.215962 | 55.65679 |      |         |         |        | 41.46581 | United King | 73.06 UK  |
| 2 UK  | 1979 | 7973  | 13.46571 | 55.69035 |      |         |         |        | 41.82387 | United King | 73.16 UK  |
| 2 UK  | 1980 | 8502  | 17.97059 | 52.32687 | 32.9 | 0.2008  | 0.22602 | 17.588 | 42.3463  | United King | 73.59 UK  |
| 2 UK  | 1981 | 9161  | 11.87983 | 50.51421 |      |         |         |        | 41.89466 | United King | 73.92 UK  |
| 2 UK  | 1982 | 9917  | 8.590529 | 50.75241 |      |         |         |        | 41.49169 | United King | 74.04 UK  |
| 2 UK  | 1983 | 10669 | 4.607018 | 52.0913  |      |         |         |        | 40.90145 | United King | 74.29 UK  |
| 2 UK  | 1984 | 11336 | 4.953409 | 57.00433 |      |         |         |        | 40.38236 | United King | 74.68 UK  |
| 2 UK  | 1985 | 12068 | 6.065421 | 56.62236 | 35.7 |         |         |        | 39.76278 | United King | 74.53 UK  |
| 2 UK  | 1986 | 12795 | 3.427615 | 52.0564  |      |         |         |        | 39.13434 | United King | 74.8 UK   |
| 2 UK  | 1987 | 13717 | 4.148918 | 51.93616 |      |         |         |        | 38.03052 | United King | 75.15 UK  |
| 2 UK  | 1988 | 14864 | 4.907976 | 49.64918 |      |         |         |        | 37.21299 | United King | 75.26 UK  |
| 2 UK  | 1989 | 15716 | 7.797271 | 51.64563 |      |         |         |        | 36.62967 | United King | 75.4 UK   |
| 2 UK  | 1990 | 16397 | 9.475588 | 51.46746 | 38.5 |         |         |        | 35.17424 | United King | 75.74 UK  |
| 2 UK  | 1991 | 16681 | 5.853981 | 48.20938 |      |         |         |        | 33.12701 | United King | 75.91 UK  |
| 2 UK  | 1992 | 17069 | 3.732601 | 49.34976 |      |         |         |        | 31.88967 | United King | 76.3 UK   |
| 2 UK  | 1993 | 17845 | 1.564474 | 52.59363 |      |         |         |        | 31.27093 | United King | 76.16 UK  |
| 2 UK  | 1994 | 18975 | 2.47645  | 54.25776 |      |         |         |        | 31.69333 | United King | 76.72 UK  |
| 2 UK  | 1995 | 19860 | 3.410996 | 57.89684 | 39.9 |         |         |        | 31.99648 | United King | 76.62 UK  |
| 2 UK  | 1996 | 20923 | 2.448706 | 59.84958 |      |         |         |        | 31.86726 | United King | 76.88 UK  |
| 2 UK  | 1997 | 22280 | 3.132333 | 57.84053 |      |         |         |        | 31.07413 | United King | 77.14 UK  |
| 2 UK  | 1998 | 23206 | 3.41817  | 55.98906 |      |         |         |        | 29.46092 | United King | 77.28 UK  |
| 2 UK  | 1999 | 23959 | 1.555385 |          |      |         |         |        | 28.59877 | United King | 77.38 UK  |
| 2 UK  | 2000 | 25583 | 2.9271   |          | 39.1 |         |         |        | 28.47661 | United King | 77.86 UK  |
| 2 UK  | 2001 | 27026 | 1.820852 |          |      |         |         |        | 27.47552 | United King | 78.13 UK  |
| 2 UK  | 2002 | 28969 | 1.634458 |          |      |         |         |        | 26.99038 | United King | 78.25 UK  |
| 2 UK  | 2003 | 29609 | 2.913632 |          |      |         |         |        | 26.59016 | United King | 78.34 UK  |
| 1 USA | 1960 | 2879  |          | 9.693181 | 43.8 |         |         |        |          | United Stal | 69.83 USA |
| 1 USA | 1961 | 2929  | 1.075182 | 9.444654 |      |         |         |        |          | United Stal | 70.24 USA |
| 1 USA | 1962 | 3103  | 1.116071 | 9.429324 |      |         |         |        |          | United Stal | 70.11 USA |
| 1 USA | 1963 | 3227  | 1.214128 | 9.470706 |      |         |         |        |          | United Stal | 69.94 USA |
| 1 USA | 1964 | 3420  | 1.308615 | 9.725879 |      |         |         |        |          | United Stal | 70.19 USA |
| 1 USA | 1965 | 3667  | 1.668461 | 9.730347 | 43.8 |         |         |        |          | United Stal | 70.24 USA |
| 1 USA | 1966 | 3974  | 2.991    | 10.09759 |      |         |         |        |          | United Stal | 70.21 USA |
| 1 USA | 1967 | 4154  | 2.775636 | 10.2081  |      |         |         |        |          | United Stal | 70.52 USA |
| 1 USA | 1968 | 4494  | 4.217721 | 10.59394 |      |         |         |        |          | United Stal | 70.22 USA |
| 1 USA | 1969 | 4805  | 5.414701 | 10.63563 |      |         |         |        |          | United Stal | 70.48 USA |
| 1 USA | 1970 | 4999  | 5.895296 | 11.38864 | 44.4 |         |         |        |          | United Stal | 70.74 USA |
| 1 USA | 1971 | 5362  | 4.255929 | 11.36758 |      |         |         |        | 34.50863 | United Stal | 71.09 USA |
| 1 USA | 1972 | 5838  | 3.305615 | 11.96716 |      |         |         |        | 34.44429 | United Stal | 71.18 USA |
| 1 USA | 1973 | 6464  | 6.220064 | 13.71356 |      |         |         |        | 34.37521 | United Stal | 71.4 USA  |
| 1 USA | 1974 | 6951  | 11.03526 | 17.31614 |      |         |         |        | 34.03606 | United Stal | 71.97 USA |
| 1 USA | 1975 | 7519  | 9.13193  | 16.37969 | 42.6 |         |         |        | 33.22567 | United Stal | 72.54 USA |
| 1 USA | 1976 | 8300  | 5.737027 | 16.87366 |      |         |         |        | 33.76085 | United Stal | 72.85 USA |
| 1 USA | 1977 | 9146  | 6.48646  | 17.22059 |      |         |         |        | 34.26464 | United Stal | 73.22 USA |
| 1 USA | 1978 | 10229 | 7.647464 | 17.80619 |      |         |         |        | 34.03723 | United Stal | 73.42 USA |
| 1 USA | 1979 | 11306 | 11.26604 | 19.28055 |      |         |         |        | 33.62648 | United Stal | 73.83 USA |
| 1 USA | 1980 | 12186 | 13.50937 | 21.08158 | 62.9 | 0.23884 | 0.24568 | 22.376 | 33.51439 | United Stal | 73.74 USA |
| 1 USA | 1981 | 13533 | 10.31553 | 20.36324 |      |         |         |        | 34.08828 | United Stal | 74.13 USA |
| 1 USA | 1982 | 13940 | 6.160616 | 18.47162 |      |         |         |        | 32.90969 | United Stal | 74.47 USA |
| 1 USA | 1983 | 15008 | 3.212435 | 17.62431 |      |         |         |        | 31.49722 | United Stal | 74.56 USA |
| 1 USA | 1984 | 16549 | 4.317269 | 18.57701 |      |         |         |        | 31.87278 | United Stal | 74.69 USA |
| 1 USA | 1985 | 17600 | 3.561116 | 17.64241 | 57.4 |         |         |        | 30.86452 | United Stal | 74.67 USA |
| 1 USA | 1986 | 18439 | 1.858736 | 17.95412 |      |         |         |        | 29.44326 | United Stal | 74.75 USA |
| 1 USA | 1987 | 19407 | 3.740876 | 19.11619 |      |         |         |        | 29.19973 | United Stal | 74.88 USA |
| 1 USA | 1988 | 20711 | 4.009088 | 20.33082 |      |         |         |        | 29.60649 | United Stal | 74.86 USA |
| 1 USA | 1989 | 22047 | 4.827003 | 20.73029 |      |         |         |        | 28.61904 | United Stal | 75.13 USA |
| 1 USA | 1990 | 23064 | 5.397956 | 21.18795 | 44.4 |         |         |        | 27.85032 | United Stal | 75.4 USA  |
| 1 USA | 1991 | 23507 | 4.234964 | 21.26635 |      |         |         |        | 26.62006 | United Stal | 75.55 USA |
| 1 USA | 1992 | 24509 | 3.02882  | 21.54221 |      |         |         |        | 25.72843 | United Stal | 75.81 USA |
| 1 USA | 1993 | 25409 | 2.951657 | 21.55765 |      |         |         |        | 25.61001 | United Stal | 75.6 USA  |
| 1 USA | 1994 | 26670 | 2.607442 | 22.61822 |      |         |         |        | 26.08295 | United Stal | 75.77 USA |
| 1 USA | 1995 | 27574 | 2.80542  | 24.27398 | 44.6 |         |         |        | 26.29285 | United Stal | 75.89 USA |
| 1 USA | 1996 | 28814 | 2.931204 | 24.58247 |      |         |         |        | 25.7854  | United Stal | 76.21 USA |
| 1 USA | 1997 | 30262 | 2.33769  | 25.59154 |      |         |         |        | 25.38429 | United Stal | 76.53 USA |
| 1 USA | 1998 | 31519 | 1.552279 | 24.69057 |      |         |         |        | 25.01884 | United Stal | 76.7 USA  |
| 1 USA | 1999 | 33028 | 2.188027 |          |      |         |         |        | 24.72505 | United Stal | 76.72 USA |
| 1 USA | 2000 | 34603 | 3.376857 |          | 39.6 |         |         |        | 24.44349 | United Stal | 76.86 USA |
| 1 USA | 2001 | 35341 | 2.826171 |          |      |         |         |        | 23.04858 | United Stal | 76.97 USA |
| 1 USA | 2002 | 36180 | 1.586032 |          |      |         |         |        |          | United Stal | 77.04 USA |
| 1 USA | 2003 | 37548 | 2.270095 |          |      |         |         |        |          | United Stal | 77.2 USA  |

|    |             |      |       |          |      |  |  |  |  |             |             |             |             |
|----|-------------|------|-------|----------|------|--|--|--|--|-------------|-------------|-------------|-------------|
| 19 | Spain       | 1960 | 1074  | 16.24982 | 3.9  |  |  |  |  | Spain       | 69.22       | Spain       |             |
| 19 | Spain       | 1961 | 1201  | 2.005919 |      |  |  |  |  | Spain       | 69.6        | Spain       |             |
| 19 | Spain       | 1962 | 1335  | 5.634759 |      |  |  |  |  | Spain       | 69.63       | Spain       |             |
| 19 | Spain       | 1963 | 1467  | 8.804627 |      |  |  |  |  | Spain       | 69.79       | Spain       |             |
| 19 | Spain       | 1964 | 1554  | 6.950187 |      |  |  |  |  | Spain       | 70.51       | Spain       |             |
| 19 | Spain       | 1965 | 1678  | 13.23638 |      |  |  |  |  | Spain       | 70.93       | Spain       |             |
| 19 | Spain       | 1966 | 1841  | 6.194115 |      |  |  |  |  | Spain       | 71.17       | Spain       |             |
| 19 | Spain       | 1967 | 1954  | 6.414575 |      |  |  |  |  | Spain       | 71.36       | Spain       |             |
| 19 | Spain       | 1968 | 2160  | 4.963315 |      |  |  |  |  | Spain       | 71.65       | Spain       |             |
| 19 | Spain       | 1969 | 2447  | 2.124452 |      |  |  |  |  | Spain       | 71.16       | Spain       |             |
| 19 | Spain       | 1970 | 2715  | 5.757617 |      |  |  |  |  | Spain       | 72.14       | Spain       |             |
| 19 | Spain       | 1971 | 2951  | 8.236041 |      |  |  |  |  | 40.66722    | Spain       | 71.73       | Spain       |
| 19 | Spain       | 1972 | 3293  | 8.289366 |      |  |  |  |  | 41.69329    | Spain       | 72.94       | Spain       |
| 19 | Spain       | 1973 | 3710  | 11.39021 |      |  |  |  |  | 42.23267    | Spain       | 72.72       | Spain       |
| 19 | Spain       | 1974 | 4227  | 15.71734 |      |  |  |  |  | 43.1723     | Spain       | 73.1        | Spain       |
| 19 | Spain       | 1975 | 4600  | 16.92566 |      |  |  |  |  | 42.08322    | Spain       | 73.48       | Spain       |
| 19 | Spain       | 1976 | 4965  | 17.62931 |      |  |  |  |  | 41.38425    | Spain       | 73.8        | Spain       |
| 19 | Spain       | 1977 | 5364  | 24.52669 |      |  |  |  |  | 40.52181    | Spain       | 74.29       | Spain       |
| 19 | Spain       | 1978 | 5761  | 19.78421 |      |  |  |  |  | 39.43257    | Spain       | 74.48       | Spain       |
| 19 | Spain       | 1979 | 6188  | 15.66901 |      |  |  |  |  | 38.96561    | Spain       | 74.98       | Spain       |
| 19 | Spain       | 1980 | 6856  | 15.54989 |      |  |  |  |  | 38.56755    | Spain       | 75.52       | Spain       |
| 19 | Spain       | 1981 | 7447  | 14.55704 |      |  |  |  |  | 37.67302    | Spain       | 75.69       | Spain       |
| 19 | Spain       | 1982 | 7957  | 14.40796 |      |  |  |  |  | 37.06181    | Spain       | 76.31       | Spain       |
| 19 | Spain       | 1983 | 8378  | 12.17745 |      |  |  |  |  | 36.7945     | Spain       | 76.09       | Spain       |
| 19 | Spain       | 1984 | 8812  | 11.27433 |      |  |  |  |  | 35.9208     | Spain       | 76.47       | Spain       |
| 19 | Spain       | 1985 | 9259  | 8.817527 |      |  |  |  |  | 36.20907    | Spain       | 76.4        | Spain       |
| 19 | Spain       | 1986 | 9744  | 8.796503 |      |  |  |  |  | 36.6543     | Spain       | 76.7        | Spain       |
| 19 | Spain       | 1987 | 10542 | 5.246259 |      |  |  |  |  | 36.09407    | Spain       | 76.95       | Spain       |
| 19 | Spain       | 1988 | 11434 | 4.840479 |      |  |  |  |  | 35.9314     | Spain       | 76.94       | Spain       |
| 19 | Spain       | 1989 | 12417 | 6.791468 |      |  |  |  |  | 36.21816    | Spain       | 76.99       | Spain       |
| 19 | Spain       | 1990 | 13365 | 6.71794  |      |  |  |  |  | 35.47665    | Spain       | 76.99       | Spain       |
| 19 | Spain       | 1991 | 14152 | 5.935327 |      |  |  |  |  | 34.68851    | Spain       | 77.12       | Spain       |
| 19 | Spain       | 1992 | 14564 | 5.925724 |      |  |  |  |  | 32.8619     | Spain       | 77.58       | Spain       |
| 19 | Spain       | 1993 | 14699 | 4.568636 |      |  |  |  |  | 31.16821    | Spain       | 77.72       | Spain       |
| 19 | Spain       | 1994 | 15325 | 4.718468 |      |  |  |  |  | 30.55055    | Spain       | 78.1        | Spain       |
| 19 | Spain       | 1995 | 16032 | 4.674753 |      |  |  |  |  | 30.98291    | Spain       | 78.19       | Spain       |
| 19 | Spain       | 1996 | 16720 | 3.558506 |      |  |  |  |  | 30.45867    | Spain       | 78.34       | Spain       |
| 19 | Spain       | 1997 | 17420 | 1.970708 |      |  |  |  |  | 30.4414     | Spain       | 78.84       | Spain       |
| 19 | Spain       | 1998 | 18479 | 1.833537 |      |  |  |  |  | 30.19667    | Spain       | 78.94       | Spain       |
| 19 | Spain       | 1999 | 19817 | 2.310672 |      |  |  |  |  | 29.9892     | Spain       | 78.95       | Spain       |
| 19 | Spain       | 2000 | 21074 | 3.432614 |      |  |  |  |  | 30.1937     | Spain       | 79.42       | Spain       |
| 19 | Spain       | 2001 | 22257 | 3.591101 |      |  |  |  |  | 29.92884    | Spain       | 79.74       | Spain       |
| 19 | Spain       | 2002 | 23756 | 3.066777 |      |  |  |  |  | 29.68476    | Spain       | 79.83       | Spain       |
| 19 | Spain       | 2003 | 24812 | 3.033474 |      |  |  |  |  | 29.58652    | Spain       | 79.76       | Spain       |
| 12 | Switzerland | 1960 | 3387  | 53.2535  | 21.8 |  |  |  |  | Switzerland | 71.41       | Switzerland |             |
| 12 | Switzerland | 1961 | 3625  | 1.845371 |      |  |  |  |  | Switzerland | 71.74       | Switzerland |             |
| 12 | Switzerland | 1962 | 3788  | 4.315616 |      |  |  |  |  | Switzerland | 71.3        | Switzerland |             |
| 12 | Switzerland | 1963 | 3946  | 3.439719 |      |  |  |  |  | Switzerland | 71.28       | Switzerland |             |
| 12 | Switzerland | 1964 | 4158  | 3.081314 |      |  |  |  |  | Switzerland | 72.18       | Switzerland |             |
| 12 | Switzerland | 1965 | 4360  | 3.414517 |      |  |  |  |  | Switzerland | 72.31       | Switzerland |             |
| 12 | Switzerland | 1966 | 4575  | 4.776131 |      |  |  |  |  | Switzerland | 72.44       | Switzerland |             |
| 12 | Switzerland | 1967 | 4790  | 4.021478 |      |  |  |  |  | Switzerland | 72.74       | Switzerland |             |
| 12 | Switzerland | 1968 | 5138  | 2.412351 |      |  |  |  |  | Switzerland | 72.7        | Switzerland |             |
| 12 | Switzerland | 1969 | 5645  | 2.489007 |      |  |  |  |  | Switzerland | 72.71       | Switzerland |             |
| 12 | Switzerland | 1970 | 6382  | 3.616027 |      |  |  |  |  | 36.26636    | Switzerland | 73.12       | Switzerland |
| 12 | Switzerland | 1971 | 6938  | 6.573013 |      |  |  |  |  | 35.98696    | Switzerland | 73.23       | Switzerland |
| 12 | Switzerland | 1972 | 7406  | 6.660192 |      |  |  |  |  | 35.70756    | Switzerland | 73.75       | Switzerland |
| 12 | Switzerland | 1973 | 7998  | 8.755041 |      |  |  |  |  | 35.42816    | Switzerland | 74.06       | Switzerland |
| 12 | Switzerland | 1974 | 8800  | 9.766747 |      |  |  |  |  | 35.14877    | Switzerland | 74.4        | Switzerland |
| 12 | Switzerland | 1975 | 8934  | 6.696453 |      |  |  |  |  | 34.77623    | Switzerland | 74.78       | Switzerland |
| 12 | Switzerland | 1976 | 9368  | 1.715862 |      |  |  |  |  | 34.49683    | Switzerland | 74.91       | Switzerland |
| 12 | Switzerland | 1977 | 10240 | 1.28527  |      |  |  |  |  | 34.21744    | Switzerland | 75.36       | Switzerland |
| 12 | Switzerland | 1978 | 11003 | 1.055814 |      |  |  |  |  | 33.93804    | Switzerland | 75.3        | Switzerland |
| 12 | Switzerland | 1979 | 12189 | 3.647643 |      |  |  |  |  | 33.65864    | Switzerland | 75.6        | Switzerland |
| 12 | Switzerland | 1980 | 13853 | 4.022026 |      |  |  |  |  | 32.87       | Switzerland | 75.58       | Switzerland |
| 12 | Switzerland | 1981 | 15338 | 6.490219 |      |  |  |  |  | 32.69       | Switzerland | 75.81       | Switzerland |
| 12 | Switzerland | 1982 | 15963 | 5.655212 |      |  |  |  |  | 32.2        | Switzerland | 76.16       | Switzerland |
| 12 | Switzerland | 1983 | 16611 | 2.967687 |      |  |  |  |  | 31.9        | Switzerland | 76.15       | Switzerland |
| 12 | Switzerland | 1984 | 17710 | 2.911208 |      |  |  |  |  | 31.92       | Switzerland | 76.75       | Switzerland |
| 12 | Switzerland | 1985 | 18812 | 3.429986 |      |  |  |  |  | 32.01       | Switzerland | 76.87       | Switzerland |
| 12 | Switzerland | 1986 | 19458 | 0.740741 |      |  |  |  |  | 31.89       | Switzerland | 77.03       | Switzerland |
| 12 | Switzerland | 1987 | 20120 | 1.447964 |      |  |  |  |  | 31.46       | Switzerland | 77.34       | Switzerland |
| 12 | Switzerland | 1988 | 21334 | 1.884478 |      |  |  |  |  | 31.61       | Switzerland | 77.36       | Switzerland |
| 12 | Switzerland | 1989 | 22965 | 3.162964 |      |  |  |  |  | 31.69       | Switzerland | 77.56       | Switzerland |
| 12 | Switzerland | 1990 | 24518 | 5.37874  |      |  |  |  |  | 31.34       | Switzerland | 77.37       | Switzerland |
| 12 | Switzerland | 1991 | 24840 | 5.879392 |      |  |  |  |  | 30.79       | Switzerland | 77.64       | Switzerland |
| 12 | Switzerland | 1992 | 25141 | 4.041076 |      |  |  |  |  | 29.99       | Switzerland | 77.94       | Switzerland |
| 12 | Switzerland | 1993 | 25427 | 3.271797 |      |  |  |  |  | 29.58       | Switzerland | 78.23       | Switzerland |
| 12 | Switzerland | 1994 | 26031 | 0.858407 |      |  |  |  |  | 30.41       | Switzerland | 78.5        | Switzerland |
| 12 | Switzerland | 1995 | 26485 | 1.798719 |      |  |  |  |  | 29.83       | Switzerland | 78.56       | Switzerland |
| 12 | Switzerland | 1996 | 26394 | 0.818824 |      |  |  |  |  | 28.81       | Switzerland | 79.05       | Switzerland |
| 12 | Switzerland | 1997 | 27850 | 0.521501 |      |  |  |  |  | 28.19       | Switzerland | 79.23       | Switzerland |
| 12 | Switzerland | 1998 | 28835 | 0.01701  |      |  |  |  |  | 27.43       | Switzerland | 79.47       | Switzerland |
| 12 | Switzerland | 1999 | 28887 | 0.82483  |      |  |  |  |  | 27.43       | Switzerland | 79.73       | Switzerland |
| 12 | Switzerland | 2000 | 30461 | 1.543392 |      |  |  |  |  | 26.76       | Switzerland | 79.84       | Switzerland |
| 12 | Switzerland | 2001 | 30806 | 0.988372 |      |  |  |  |  | 27.35       | Switzerland | 80.26       | Switzerland |
| 12 | Switzerland | 2002 | 32751 | 0.6415   |      |  |  |  |  | 26.78       | Switzerland | 80.44       | Switzerland |
| 12 | Switzerland | 2003 | 33516 | 0.629239 |      |  |  |  |  | 26.45       | Switzerland | 80.54       | Switzerland |

|             |      |       |          |          |      |         |         |          |          |                |                |
|-------------|------|-------|----------|----------|------|---------|---------|----------|----------|----------------|----------------|
| 10 Norway   | 1960 | 1713  |          | 73 68096 | 21.3 |         |         |          | Norway   | 73 57 Norway   |                |
| 10 Norway   | 1961 | 1823  | 2 451108 | 72 13998 |      |         |         |          | Norway   | 73 57 Norway   |                |
| 10 Norway   | 1962 | 1905  | 5 268516 | 69 34479 |      |         |         |          | Norway   | 73 46 Norway   |                |
| 10 Norway   | 1963 | 1991  | 2 587041 | 70 4398  |      |         |         |          | Norway   | 73 1 Norway    |                |
| 10 Norway   | 1964 | 2112  | 5 679944 | 71 78108 |      |         |         |          | Norway   | 73 61 Norway   |                |
| 10 Norway   | 1965 | 2268  | 4 25959  | 71 81725 | 22.4 |         |         |          | Norway   | 73 72 Norway   |                |
| 10 Norway   | 1966 | 2417  | 3 251337 | 72 5338  |      |         |         |          | Norway   | 74 01 Norway   |                |
| 10 Norway   | 1967 | 2620  | 4 433395 | 74 77306 |      |         |         |          | Norway   | 74 08 Norway   |                |
| 10 Norway   | 1968 | 2784  | 3 471534 | 73 59362 |      |         |         |          | Norway   | 73 95 Norway   |                |
| 10 Norway   | 1969 | 3035  | 3 067485 | 72 03036 |      |         |         |          | Norway   | 73 66 Norway   |                |
| 10 Norway   | 1970 | 3213  | 10 56548 | 74 13993 | 31.1 |         |         |          | Norway   | 74 07 Norway   |                |
| 10 Norway   | 1971 | 3523  | 6 258412 | 73 00291 |      |         |         | 31.94468 | Norway   | 74 17 Norway   |                |
| 10 Norway   | 1972 | 3814  | 7 219759 | 70 42838 |      |         |         | 32 23043 | Norway   | 74 34 Norway   |                |
| 10 Norway   | 1973 | 4138  | 7 44241  | 76 50484 |      |         |         | 32 27221 | Norway   | 74 44 Norway   |                |
| 10 Norway   | 1974 | 4728  | 9 414514 | 83 27903 |      |         |         | 33 08653 | Norway   | 74 76 Norway   |                |
| 10 Norway   | 1975 | 5458  | 11 70707 | 78 7672  | 34.8 |         |         | 34 62412 | Norway   | 74 82 Norway   |                |
| 10 Norway   | 1976 | 6116  | 9 175756 | 79 93233 |      |         |         | 34 2097  | Norway   | 75 05 Norway   |                |
| 10 Norway   | 1977 | 6742  | 9 043156 | 78 69983 |      |         |         | 34 0764  | Norway   | 75 39 Norway   |                |
| 10 Norway   | 1978 | 7412  | 8 151506 | 72 255   |      |         |         | 35 43352 | Norway   | 75 43 Norway   |                |
| 10 Norway   | 1979 | 8354  | 4 759825 | 77 27374 |      |         |         | 38 27974 | Norway   | 75 41 Norway   |                |
| 10 Norway   | 1980 | 9557  | 10 89621 | 80 33016 | 39.3 | 0.33696 | 0.37418 | 31.594   | 40 38873 | Norway         | 75 67 Norway   |
| 10 Norway   | 1981 | 10548 | 13 63705 | 79 6489  |      |         |         |          | 40 68092 | Norway         | 75 88 Norway   |
| 10 Norway   | 1982 | 11205 | 11 37206 | 78 18887 |      |         |         |          | 40 84821 | Norway         | 76 02 Norway   |
| 10 Norway   | 1983 | 12022 | 8 411048 | 76 31546 |      |         |         |          | 42 04797 | Norway         | 76 08 Norway   |
| 10 Norway   | 1984 | 13220 | 6 279108 | 77 48017 |      |         |         |          | 43 46854 | Norway         | 76 25 Norway   |
| 10 Norway   | 1985 | 14354 | 5 665824 | 78 74471 | 41   |         |         |          | 42 85285 | Norway         | 75 93 Norway   |
| 10 Norway   | 1986 | 15184 | 7 186768 | 72 85357 |      |         |         |          | 36 27047 | Norway         | 76 25 Norway   |
| 10 Norway   | 1987 | 15823 | 8 725932 | 67 69511 |      |         |         |          | 35 80692 | Norway         | 76 1 Norway    |
| 10 Norway   | 1988 | 16299 | 6 698484 | 67 40089 |      |         |         |          | 34 0042  | Norway         | 76 26 Norway   |
| 10 Norway   | 1989 | 17043 | 4 555442 | 73 29363 |      |         |         |          | 35 5254  | Norway         | 76 54 Norway   |
| 10 Norway   | 1990 | 18004 | 4 113033 | 74 73464 | 69.6 |         |         |          | 35 66044 | Norway         | 76 58 Norway   |
| 10 Norway   | 1991 | 19212 | 3 420683 | 72 62285 |      |         |         |          | 34 55202 | Norway         | 77 04 Norway   |
| 10 Norway   | 1992 | 20185 | 2 342116 | 69 54725 |      |         |         |          | 34 17055 | Norway         | 77 24 Norway   |
| 10 Norway   | 1993 | 21088 | 2 271489 | 70 1258  |      |         |         |          | 33 76404 | Norway         | 77 22 Norway   |
| 10 Norway   | 1994 | 22534 | 1 398555 | 70 58623 |      |         |         |          | 34 25858 | Norway         | 77 78 Norway   |
| 10 Norway   | 1995 | 23874 | 2 456405 | 70 1032  | 66.7 |         |         |          | 35 35278 | Norway         | 77 79 Norway   |
| 10 Norway   | 1996 | 26263 | 1 258694 | 72 61958 |      |         |         |          | 37 7201  | Norway         | 78 23 Norway   |
| 10 Norway   | 1997 | 27776 | 2 580741 | 75 46217 |      |         |         |          | 38 2629  | Norway         | 78 23 Norway   |
| 10 Norway   | 1998 | 27294 | 2 255686 | 74 28209 |      |         |         |          | 33 82029 | Norway         | 78 41 Norway   |
| 10 Norway   | 1999 | 30011 | 2 333139 |          |      |         |         |          | 35 71146 | Norway         | 78 38 Norway   |
| 10 Norway   | 2000 | 36273 | 3 086068 |          | 62.5 |         |         |          | 42 95295 | Norway         | 78 69 Norway   |
| 10 Norway   | 2001 | 37078 | 3 017378 |          |      |         |         |          | 40 8742  | Norway         | 78 89 Norway   |
| 10 Norway   | 2002 | 36617 | 1 288146 |          |      |         |         |          | 37 90837 | Norway         | 78 96 Norway   |
| 10 Norway   | 2003 | 37245 | 2 475397 |          |      |         |         |          | 37 51624 | Norway         | 79 53 Norway   |
| 18 Portugal | 1960 | 728   |          | 37 35394 | 3.5  |         |         |          | Portugal | 64 17 Portugal |                |
| 18 Portugal | 1961 | 783   | 1 549002 | 39 98289 |      |         |         |          | Portugal | 62 78 Portugal |                |
| 18 Portugal | 1962 | 848   | 2 662071 | 38 32179 |      |         |         |          | Portugal | 64 3 Portugal  |                |
| 18 Portugal | 1963 | 905   | 2 021573 | 39 37737 |      |         |         |          | Portugal | 64 93 Portugal |                |
| 18 Portugal | 1964 | 979   | 3 4      | 50 41978 |      |         |         |          | Portugal | 65 16 Portugal |                |
| 18 Portugal | 1965 | 1084  | 3 481625 | 52 90274 | 3.9  |         |         |          | Portugal | 66 09 Portugal |                |
| 18 Portugal | 1966 | 1170  | 5 046729 | 52 80592 |      |         |         |          | Portugal | 65 6 Portugal  |                |
| 18 Portugal | 1967 | 1293  | 5 516014 | 51 5496  |      |         |         |          | Portugal | 66 5 Portugal  |                |
| 18 Portugal | 1968 | 1475  | 6 070827 | 49 79484 |      |         |         |          | Portugal | 66 8 Portugal  |                |
| 18 Portugal | 1969 | 1592  | 7 402512 | 48 17641 |      |         |         |          | Portugal | 66 4 Portugal  |                |
| 18 Portugal | 1970 | 1916  | 4 533333 | 50 21158 | 6.8  |         |         |          | Portugal | 67 06 Portugal |                |
| 18 Portugal | 1971 | 2153  | 7 496075 | 51 90705 |      |         |         | 35 13776 | Portugal | 66 85 Portugal |                |
| 18 Portugal | 1972 | 2420  | 8 94487  | 53 73326 |      |         |         | 35 94559 | Portugal | 69 17 Portugal |                |
| 18 Portugal | 1973 | 2845  | 10 35523 | 54 88761 |      |         |         | 35 96346 | Portugal | 68 58 Portugal |                |
| 18 Portugal | 1974 | 3048  | 27 96842 | 62 63343 |      |         |         | 37 54448 | Portugal | 69 13 Portugal |                |
| 18 Portugal | 1975 | 3045  | 20 40816 | 48 22217 | 9.6  |         |         | 35 2115  | Portugal | 68 86 Portugal |                |
| 18 Portugal | 1976 | 3407  | 18 2499  | 43 77534 |      |         |         | 34 72538 | Portugal | 69 08 Portugal |                |
| 18 Portugal | 1977 | 3784  | 27 19167 | 47 03732 |      |         |         | 34 72417 | Portugal | 70 33 Portugal |                |
| 18 Portugal | 1978 | 4120  | 22 64299 | 47 7536  |      |         |         | 33 15321 | Portugal | 70 79 Portugal |                |
| 18 Portugal | 1979 | 4663  | 23 53758 | 58 92996 |      |         |         | 31 94781 | Portugal | 71 59 Portugal |                |
| 18 Portugal | 1980 | 5263  | 16 69189 | 62 97908 | 10.6 | 0.24082 | 0.29798 | 26.488   | 32 87777 | Portugal       | 71 66 Portugal |
| 18 Portugal | 1981 | 5812  | 20 04076 | 64 51057 |      |         |         |          | 33 93985 | Portugal       | 71 89 Portugal |
| 18 Portugal | 1982 | 6263  | 22 73022 | 64 73094 |      |         |         |          | 33 64522 | Portugal       | 72 7 Portugal  |
| 18 Portugal | 1983 | 6479  | 25 10564 | 68 44718 |      |         |         |          | 34 49608 | Portugal       | 72 64 Portugal |
| 18 Portugal | 1984 | 6570  | 28 78333 | 74 85384 |      |         |         |          | 32 84181 | Portugal       | 72 93 Portugal |
| 18 Portugal | 1985 | 6959  | 19 6454  | 71 50999 | 13.7 |         |         |          | 32 82258 | Portugal       | 73 21 Portugal |
| 18 Portugal | 1986 | 7414  | 11 76311 | 62 80074 |      |         |         |          | 30 64454 | Portugal       | 73 64 Portugal |
| 18 Portugal | 1987 | 8126  | 9 343148 | 69 23901 |      |         |         |          | 30 37263 | Portugal       | 74 05 Portugal |
| 18 Portugal | 1988 | 9057  | 9 697048 | 73 42918 |      |         |         |          | 32 47451 | Portugal       | 74 09 Portugal |
| 18 Portugal | 1989 | 10042 | 12 61655 | 75 04156 |      |         |         |          | 32 34439 | Portugal       | 74 66 Portugal |
| 18 Portugal | 1990 | 10894 | 13 37246 | 75 17775 | 14.8 |         |         |          | 31 71348 | Portugal       | 74 29 Portugal |
| 18 Portugal | 1991 | 11783 | 10 92623 | 69 90818 |      |         |         |          | 30 28444 | Portugal       | 74 23 Portugal |
| 18 Portugal | 1992 | 12219 | 8 941667 | 65 14225 |      |         |         |          | 30 2792  | Portugal       | 74 87 Portugal |
| 18 Portugal | 1993 | 12236 | 6 501951 | 62 44869 |      |         |         |          | 29 60257 | Portugal       | 74 75 Portugal |
| 18 Portugal | 1994 | 12614 | 5 214394 | 65 60572 |      |         |         |          | 30 64367 | Portugal       | 75 72 Portugal |
| 18 Portugal | 1995 | 13413 | 4 123148 | 68 57445 | 14.7 |         |         |          | 31 49808 | Portugal       | 75 54 Portugal |
| 18 Portugal | 1996 | 13974 | 3 120697 | 69 22182 |      |         |         |          | 31 74154 | Portugal       | 75 47 Portugal |
| 18 Portugal | 1997 | 14804 | 2 161612 | 71 54989 |      |         |         |          | 31 63949 | Portugal       | 75 91 Portugal |
| 18 Portugal | 1998 | 15401 | 2 71644  |          |      |         |         |          | 31 13629 | Portugal       | 76 11 Portugal |
| 18 Portugal | 1999 | 16363 | 2 303886 |          |      |         |         |          | 30 41585 | Portugal       | 76 31 Portugal |
| 18 Portugal | 2000 | 17353 | 2 846721 |          | 14.9 |         |         |          | 29 99342 | Portugal       | 76 81 Portugal |
| 18 Portugal | 2001 | 18071 | 4 394757 |          |      |         |         |          | 29 39245 | Portugal       | 77 13 Portugal |
| 18 Portugal | 2002 | 18799 | 3 545052 |          |      |         |         |          | 28 68818 | Portugal       | 77 35 Portugal |
| 18 Portugal | 2003 | 17603 | 3 283333 |          |      |         |         |          | Portugal | 77 55 Portugal |                |

|    |             |      |       |          |          |      |         |         |          |             |             |             |             |
|----|-------------|------|-------|----------|----------|------|---------|---------|----------|-------------|-------------|-------------|-------------|
| 9  | Netherland  | 1960 | 2113  | 90.88709 | 11.1     |      |         |         |          | Netherland  | 73.36       | Netherlands |             |
| 9  | Netherland  | 1961 | 2111  | 1.732093 | 88.21291 |      |         |         |          | Netherland  | 73.55       | Netherlands |             |
| 9  | Netherland  | 1962 | 2275  | 2.286038 | 86.70377 |      |         |         |          | Netherland  | 73.22       | Netherlands |             |
| 9  | Netherland  | 1963 | 2360  | 3.343184 | 87.91217 |      |         |         |          | Netherland  | 73.35       | Netherlands |             |
| 9  | Netherland  | 1964 | 2566  | 5.790884 | 86.53982 |      |         |         |          | Netherland  | 73.73       | Netherlands |             |
| 9  | Netherland  | 1965 | 2739  | 5.794898 | 83.92977 | 13.6 |         |         |          | Netherland  | 73.6        | Netherlands |             |
| 9  | Netherland  | 1966 | 2874  | 5.79687  | 82.38142 |      |         |         |          | Netherland  | 73.55       | Netherlands |             |
| 9  | Netherland  | 1967 | 3078  | 3.486793 | 79.59118 |      |         |         |          | Netherland  | 73.83       | Netherlands |             |
| 9  | Netherland  | 1968 | 3399  | 3.675613 | 79.65446 |      |         |         |          | Netherland  | 73.64       | Netherlands |             |
| 9  | Netherland  | 1969 | 3951  | 7.42825  | 82.78465 |      |         |         |          | Netherland  | 73.56       | Netherlands |             |
| 9  | Netherland  | 1970 | 4342  | 3.679937 | 88.73793 | 45.8 |         |         |          | Netherland  | 73.62       | Netherlands |             |
| 9  | Netherland  | 1971 | 4705  | 7.47758  | 88.53603 |      |         |         | 37.20113 | Netherland  | 73.86       | Netherlands |             |
| 9  | Netherland  | 1972 | 4984  | 7.79175  | 84.7172  |      |         |         | 36.9602  | Netherland  | 73.78       | Netherlands |             |
| 9  | Netherland  | 1973 | 5475  | 8.013519 | 88.92212 |      |         |         | 36.77002 | Netherland  | 74.22       | Netherlands |             |
| 9  | Netherland  | 1974 | 6165  | 9.609367 | 102.1402 |      |         |         | 36.93427 | Netherland  | 74.61       | Netherlands |             |
| 9  | Netherland  | 1975 | 6699  | 10.21273 | 93.63818 | 44.3 |         |         | 35.57053 | Netherland  | 74.55       | Netherlands |             |
| 9  | Netherland  | 1976 | 7345  | 9.057487 | 95.7662  |      |         |         | 35.76351 | Netherland  | 74.67       | Netherlands |             |
| 9  | Netherland  | 1977 | 7959  | 6.474103 | 91.19662 |      |         |         | 35.20782 | Netherland  | 75.26       | Netherlands |             |
| 9  | Netherland  | 1978 | 8676  | 4.080017 | 87.71375 |      |         |         | 34.13189 | Netherland  | 75.17       | Netherlands |             |
| 9  | Netherland  | 1979 | 9504  | 4.210454 | 96.2868  |      |         |         | 34.08447 | Netherland  | 75.65       | Netherlands |             |
| 9  | Netherland  | 1980 | 10458 | 6.73332  | 102.6575 | 44.1 | 0.29368 | 0.30778 | 21.84    | 34.51798    | Netherland  | 75.77       | Netherlands |
| 9  | Netherland  | 1981 | 11304 | 6.748466 | 109.6119 |      |         |         | 34.74647 | Netherland  | 75.98       | Netherlands |             |
| 9  | Netherland  | 1982 | 11784 | 5.862069 | 107.3393 |      |         |         | 34.06893 | Netherland  | 76.06       | Netherlands |             |
| 9  | Netherland  | 1983 | 12419 | 2.823019 | 106.9498 |      |         |         | 33.90657 | Netherland  | 76.25       | Netherlands |             |
| 9  | Netherland  | 1984 | 13234 | 3.273495 | 114.4047 |      |         |         | 34.55178 | Netherland  | 76.32       | Netherlands |             |
| 9  | Netherland  | 1985 | 13938 | 2.223926 | 116.7998 | 44.7 |         |         | 34.86816 | Netherland  | 76.37       | Netherlands |             |
| 9  | Netherland  | 1986 | 14613 | 0.100025 | 97.60883 |      |         |         | 32.41933 | Netherland  | 76.34       | Netherlands |             |
| 9  | Netherland  | 1987 | 15197 | -0.7078  | 96.81971 |      |         |         | 30.76184 | Netherland  | 76.81       | Netherlands |             |
| 9  | Netherland  | 1988 | 16082 | 0.746394 | 101.0815 |      |         |         | 30.96866 | Netherland  | 76.99       | Netherlands |             |
| 9  | Netherland  | 1989 | 17387 | 1.082161 | 106.4914 |      |         |         | 30.66598 | Netherland  | 76.83       | Netherlands |             |
| 9  | Netherland  | 1990 | 18665 | 3.285469 | 103.6821 | 45.4 |         |         | 30.71949 | Netherland  | 77          | Netherlands |             |
| 9  | Netherland  | 1991 | 19626 | 3.133333 | 103.301  |      |         |         | 30.41988 | Netherland  | 77.15       | Netherlands |             |
| 9  | Netherland  | 1992 | 20224 | 3.183581 | 99.63787 |      |         |         | 29.34567 | Netherland  | 77.36       | Netherlands |             |
| 9  | Netherland  | 1993 | 20679 | 2.584182 | 94.70643 |      |         |         | 28.65413 | Netherland  | 77.04       | Netherlands |             |
| 9  | Netherland  | 1994 | 21588 | 2.801527 | 95.98548 |      |         |         | 28.54458 | Netherland  | 77.51       | Netherlands |             |
| 9  | Netherland  | 1995 | 22585 | 2.095282 | 99.49503 | 46.3 |         |         | 28.74623 | Netherland  | 77.54       | Netherlands |             |
| 9  | Netherland  | 1996 | 23531 | 2.016667 | 101.0114 |      |         |         | 28.43318 | Netherland  | 77.55       | Netherlands |             |
| 9  | Netherland  | 1997 | 24692 | 2.15651  | 104.8999 |      |         |         | 27.83015 | Netherland  | 77.92       | Netherlands |             |
| 9  | Netherland  | 1998 | 25811 | 1.983048 |          |      |         |         | 27.106   | Netherland  | 78          | Netherlands |             |
| 9  | Netherland  | 1999 | 26654 | 2.211071 |          |      |         |         | 26.31304 | Netherland  | 77.96       | Netherlands |             |
| 9  | Netherland  | 2000 | 28467 | 2.52378  |          | 45.4 |         |         | 26.79988 | Netherland  | 78.12       | Netherlands |             |
| 9  | Netherland  | 2001 | 30359 | 4.534231 |          |      |         |         | 26.62816 | Netherland  | 78.33       | Netherlands |             |
| 9  | Netherland  | 2002 | 31284 | 3.467068 |          |      |         |         | 25.82768 | Netherland  | 78.41       | Netherlands |             |
| 9  | Netherland  | 2003 | 31792 | 2.11464  |          |      |         |         |          | Netherland  | 78.66       | Netherlands |             |
| 21 | New Zealand | 1960 | 2545  | 52.54882 | 58       |      |         |         |          | New Zealand | 71.22       | New Zealand |             |
| 21 | New Zealand | 1961 | 2659  | 1.830283 | 52.94457 |      |         |         |          | New Zealand | 70.93       | New Zealand |             |
| 21 | New Zealand | 1962 | 2713  | 2.696079 | 48.80368 |      |         |         |          | New Zealand | 71.2        | New Zealand |             |
| 21 | New Zealand | 1963 | 2866  | 1.909308 | 53.84496 |      |         |         |          | New Zealand | 71.27       | New Zealand |             |
| 21 | New Zealand | 1964 | 3001  | 3.434817 | 50.79603 |      |         |         |          | New Zealand | 71.29       | New Zealand |             |
| 21 | New Zealand | 1965 | 3224  | 3.396226 | 44.78164 | 54.3 |         |         |          | New Zealand | 71.21       | New Zealand |             |
| 21 | New Zealand | 1966 | 3481  | 2.773723 | 45.96717 |      |         |         |          | New Zealand | 71.07       | New Zealand |             |
| 21 | New Zealand | 1967 | 3360  | 6.107955 | 39.77977 |      |         |         |          | New Zealand | 71.44       | New Zealand |             |
| 21 | New Zealand | 1968 | 3489  | 4.283802 | 44.66377 |      |         |         |          | New Zealand | 71.09       | New Zealand |             |
| 21 | New Zealand | 1969 | 3969  | 4.878049 | 46.90852 |      |         |         |          | New Zealand | 71.47       | New Zealand |             |
| 21 | New Zealand | 1970 | 4136  | 6.548347 | 48.32402 | 54.5 |         |         |          | New Zealand | 71.22       | New Zealand |             |
| 21 | New Zealand | 1971 | 4438  | 10.30303 | 45.48153 |      |         |         | 34.0294  | New Zealand | 71.72       | New Zealand |             |
| 21 | New Zealand | 1972 | 4780  | 6.776557 | 47.43124 |      |         |         | 33.20894 | New Zealand | 71.83       | New Zealand |             |
| 21 | New Zealand | 1973 | 5335  | 8.233276 | 49.57341 |      |         |         | 32.4518  | New Zealand | 71.68       | New Zealand |             |
| 21 | New Zealand | 1974 | 6041  | 11.25198 | 55.45852 |      |         |         | 35.5166  | New Zealand | 71.94       | New Zealand |             |
| 21 | New Zealand | 1975 | 6382  | 14.52991 | 54.88925 | 57.1 |         |         | 34.52904 | New Zealand | 72.2        | New Zealand |             |
| 21 | New Zealand | 1976 | 6748  | 16.79104 | 57.88928 |      |         |         | 34.71202 | New Zealand | 72.4        | New Zealand |             |
| 21 | New Zealand | 1977 | 6867  | 14.58999 | 56.79647 |      |         |         | 32.95466 | New Zealand | 72.14       | New Zealand |             |
| 21 | New Zealand | 1978 | 7301  | 11.89591 | 55.04187 |      |         |         | 32.50108 | New Zealand | 73.01       | New Zealand |             |
| 21 | New Zealand | 1979 | 7915  | 13.70432 | 61.89754 |      |         |         | 32.65749 | New Zealand | 73.05       | New Zealand |             |
| 21 | New Zealand | 1980 | 8656  | 17.09277 | 62.08681 | 46.1 | 0.26664 | 0.29516 | 25.522   | 32.18576    | New Zealand | 72.87       | New Zealand |
| 21 | New Zealand | 1981 | 9736  | 15.34623 | 62.44667 |      |         |         | 34.01445 | New Zealand | 73.63       | New Zealand |             |
| 21 | New Zealand | 1982 | 10687 | 16.1709  | 62.35155 |      |         |         | 34.55593 | New Zealand | 73.73       | New Zealand |             |
| 21 | New Zealand | 1983 | 11262 | 7.35568  | 61.91337 |      |         |         | 33.40371 | New Zealand | 73.83       | New Zealand |             |
| 21 | New Zealand | 1984 | 12141 | 6.201214 | 70.57388 |      |         |         | 34.58643 | New Zealand | 74.37       | New Zealand |             |
| 21 | New Zealand | 1985 | 12556 | 15.39404 | 64.61287 | 46.6 |         |         | 33.26814 | New Zealand | 73.87       | New Zealand |             |
| 21 | New Zealand | 1986 | 13085 | 13.21782 | 55.48104 |      |         |         | 31.91995 | New Zealand | 74.12       | New Zealand |             |
| 21 | New Zealand | 1987 | 13402 | 15.74115 | 52.39779 |      |         |         | 30.22941 | New Zealand | 74.21       | New Zealand |             |
| 21 | New Zealand | 1988 | 13569 | 6.375142 | 50.62526 |      |         |         | 28.58743 | New Zealand | 74.47       | New Zealand |             |
| 21 | New Zealand | 1989 | 14124 | 7.490603 | 53.81931 |      |         |         | 29.19099 | New Zealand | 74.89       | New Zealand |             |
| 21 | New Zealand | 1990 | 14420 | 5.506608 | 54.53501 | 24.1 |         |         | 27.92192 | New Zealand | 75.43       | New Zealand |             |
| 21 | New Zealand | 1991 | 14252 | 1.670146 | 56.42813 |      |         |         | 27.3392  | New Zealand | 76.07       | New Zealand |             |
| 21 | New Zealand | 1992 | 14679 | 1.026694 | 61.14054 |      |         |         | 27.11838 | New Zealand | 76.19       | New Zealand |             |
| 21 | New Zealand | 1993 | 15605 | 1.422764 | 59.26334 |      |         |         | 27.06921 | New Zealand | 76.5        | New Zealand |             |
| 21 | New Zealand | 1994 | 16686 | 2.40481  | 60.43647 |      |         |         | 27.76848 | New Zealand | 76.92       | New Zealand |             |
| 21 | New Zealand | 1995 | 17402 | 3.739837 | 58.59611 | 26.6 |         |         | 26.99032 | New Zealand | 76.79       | New Zealand |             |
| 21 | New Zealand | 1996 | 17879 | 2.298851 | 57.03107 |      |         |         | 26.74216 | New Zealand | 76.81       | New Zealand |             |
| 21 | New Zealand | 1997 | 18510 | 1.174668 | 57.1321  |      |         |         | 26.50679 | New Zealand | 77.36       | New Zealand |             |
| 21 | New Zealand | 1998 | 18669 | 1.287229 |          |      |         |         | 25.27657 | New Zealand | 78.17       | New Zealand |             |
| 21 | New Zealand | 1999 | 19937 | -0.1246  |          |      |         |         | 25.51298 | New Zealand | 77.92       | New Zealand |             |
| 21 | New Zealand | 2000 | 20789 | 2.619761 |          | 26.3 |         |         | 25.29168 | New Zealand | 78.67       | New Zealand |             |
| 21 | New Zealand | 2001 | 21825 | 2.625821 |          |      |         |         |          | New Zealand | 78.68       | New Zealand |             |
| 21 | New Zealand | 2002 | 22662 | 2.677091 |          |      |         |         |          | New Zealand | 78.88       | New Zealand |             |
| 21 | New Zealand | 2003 | 23728 | 1.753576 |          |      |         |         |          | New Zealand | 79.16       | New Zealand |             |

|    |       |      |       |          |      |         |         |        |          |       |       |       |
|----|-------|------|-------|----------|------|---------|---------|--------|----------|-------|-------|-------|
| 8  | Italy | 1960 | 1620  | 26.57343 | 13.9 |         |         |        |          | Italy | 69.19 | Italy |
| 8  | Italy | 1961 | 1763  | 2.702703 |      |         |         |        |          | Italy | 69.83 | Italy |
| 8  | Italy | 1962 | 1900  | 3.947368 |      |         |         |        |          | Italy | 69.22 | Italy |
| 8  | Italy | 1963 | 2021  | 7.594937 |      |         |         |        |          | Italy | 69.32 | Italy |
| 8  | Italy | 1964 | 2093  | 5.882353 |      |         |         |        |          | Italy | 70.38 | Italy |
| 8  | Italy | 1965 | 2205  | 4.444445 |      |         |         |        |          | Italy | 70.25 | Italy |
| 8  | Italy | 1966 | 2400  | 3.191489 | 14.1 |         |         |        |          | Italy | 70.99 | Italy |
| 8  | Italy | 1967 | 2624  | 3.092783 |      |         |         |        |          | Italy | 71.04 | Italy |
| 8  | Italy | 1968 | 2910  | 2        |      |         |         |        |          | Italy | 70.85 | Italy |
| 8  | Italy | 1969 | 3227  | 1.960784 |      |         |         |        |          | Italy | 70.87 | Italy |
| 8  | Italy | 1970 | 3602  | 4.807693 |      |         |         |        |          | Italy | 71.63 | Italy |
| 8  | Italy | 1971 | 3834  | 5.504587 |      |         |         |        | 40.38538 | Italy | 71.88 | Italy |
| 8  | Italy | 1972 | 4101  | 5.217391 |      |         |         |        | 39.51487 | Italy | 72.15 | Italy |
| 8  | Italy | 1973 | 4594  | 10.7438  |      |         |         |        | 40.68504 | Italy | 72.1  | Italy |
| 8  | Italy | 1974 | 5240  | 19.40298 |      |         |         |        | 42.32259 | Italy | 72.81 | Italy |
| 8  | Italy | 1975 | 5601  | 16.875   |      |         |         |        | 41.31369 | Italy | 72.72 | Italy |
| 8  | Italy | 1976 | 6288  | 16.57754 |      |         |         |        | 42.21162 | Italy | 73.07 | Italy |
| 8  | Italy | 1977 | 6821  | 17.43119 |      |         |         |        | 41.67762 | Italy | 73.44 | Italy |
| 8  | Italy | 1978 | 7542  | 12.10938 |      |         |         |        | 41.04507 | Italy | 73.78 | Italy |
| 8  | Italy | 1979 | 8594  | 14.63415 |      |         |         |        | 40.67571 | Italy | 74.11 | Italy |
| 8  | Italy | 1980 | 9643  | 21.2766  |      |         |         |        | 40.37956 | Italy | 74.06 | Italy |
| 8  | Italy | 1981 | 10593 | 17.79449 | 29.2 | 0.37278 | 0.32452 | 26.728 | 39.03865 | Italy | 74.44 | Italy |
| 8  | Italy | 1982 | 11275 | 16.38298 |      |         |         |        | 38.13298 | Italy | 74.92 | Italy |
| 8  | Italy | 1983 | 11812 | 14.62523 |      |         |         |        | 36.95853 | Italy | 74.73 | Italy |
| 8  | Italy | 1984 | 12543 | 10.84529 |      |         |         |        | 36.52842 | Italy | 75.49 | Italy |
| 8  | Italy | 1985 | 13285 | 9.208633 |      |         |         |        | 36.09994 | Italy | 75.6  | Italy |
| 8  | Italy | 1986 | 13896 | 5.797101 | 30.3 |         |         |        | 34.897   | Italy | 75.91 | Italy |
| 8  | Italy | 1987 | 14688 | 4.732254 |      |         |         |        | 34.5781  | Italy | 76.34 | Italy |
| 8  | Italy | 1988 | 15784 | 5.112961 |      |         |         |        | 34.44107 | Italy | 76.52 | Italy |
| 8  | Italy | 1989 | 16875 | 6.221719 |      |         |         |        | 34.55434 | Italy | 76.92 | Italy |
| 8  | Italy | 1990 | 17946 | 6.496273 |      |         |         |        | 33.898   | Italy | 76.99 | Italy |
| 8  | Italy | 1991 | 18845 | 6.3      | 31.5 |         |         |        | 32.9108  | Italy | 76.99 | Italy |
| 8  | Italy | 1992 | 19367 | 5.079962 |      |         |         |        | 32.38869 | Italy | 77.36 | Italy |
| 8  | Italy | 1993 | 19778 | 4.476276 |      |         |         |        | 31.35425 | Italy | 77.65 | Italy |
| 8  | Italy | 1994 | 20577 | 4.027421 |      |         |         |        | 31.30136 | Italy | 77.87 | Italy |
| 8  | Italy | 1995 | 21532 | 5.244371 |      |         |         |        | 31.50129 | Italy | 78.12 | Italy |
| 8  | Italy | 1996 | 22235 | 3.974524 | 32.4 |         |         |        | 30.50213 | Italy | 78.44 | Italy |
| 8  | Italy | 1997 | 22810 | 2.043106 |      |         |         |        | 30.06423 | Italy | 78.73 | Italy |
| 8  | Italy | 1998 | 23840 | 1.96294  |      |         |         |        | 29.91003 | Italy | 78.82 | Italy |
| 8  | Italy | 1999 | 24402 | 1.655629 |      |         |         |        | 29.31141 | Italy | 79.21 | Italy |
| 8  | Italy | 2000 | 25759 | 2.537687 |      |         |         |        | 29.04274 | Italy | 79.62 | Italy |
| 8  | Italy | 2001 | 26586 | 2.785166 | 32   |         |         |        | 28.74293 | Italy | 79.89 | Italy |
| 8  | Italy | 2002 | 27320 | 2.46532  |      |         |         |        | 28.28014 | Italy | 80.12 | Italy |
| 8  | Italy | 2003 | 27537 | 2.672559 |      |         |         |        | 27.80482 | Italy | 80.19 | Italy |
| 14 | Japan | 1960 | 1010  | 20.95434 | 30.9 |         |         |        |          | Japan | 67.7  | Japan |
| 14 | Japan | 1961 | 1143  | 5.404726 |      |         |         |        |          | Japan | 68.35 | Japan |
| 14 | Japan | 1962 | 1262  | 6.773193 |      |         |         |        |          | Japan | 68.63 | Japan |
| 14 | Japan | 1963 | 1374  | 7.66138  |      |         |         |        |          | Japan | 69.71 | Japan |
| 14 | Japan | 1964 | 1546  | 3.838174 |      |         |         |        |          | Japan | 70.18 | Japan |
| 14 | Japan | 1965 | 1647  | 6.593407 |      |         |         |        |          | Japan | 70.23 | Japan |
| 14 | Japan | 1966 | 1889  | 5.079663 | 36.7 |         |         |        |          | Japan | 71.04 | Japan |
| 14 | Japan | 1967 | 2133  | 3.977881 |      |         |         |        |          | Japan | 71.34 | Japan |
| 14 | Japan | 1968 | 2496  | 5.369703 |      |         |         |        |          | Japan | 71.66 | Japan |
| 14 | Japan | 1969 | 2917  | 5.242592 |      |         |         |        |          | Japan | 71.89 | Japan |
| 14 | Japan | 1970 | 3293  | 7.673267 |      |         |         |        |          | Japan | 71.99 | Japan |
| 14 | Japan | 1971 | 3575  | 6.416972 |      |         |         |        | 45.17072 | Japan | 72.81 | Japan |
| 14 | Japan | 1972 | 3988  | 4.824022 |      |         |         |        | 44.57824 | Japan | 73.24 | Japan |
| 14 | Japan | 1973 | 4491  | 11.64593 |      |         |         |        | 45.35773 | Japan | 73.4  | Japan |
| 14 | Japan | 1974 | 4778  | 23.15457 |      |         |         |        | 43.6329  | Japan | 73.83 | Japan |
| 14 | Japan | 1975 | 5300  | 11.78279 |      |         |         |        | 41.40548 | Japan | 74.34 | Japan |
| 14 | Japan | 1976 | 5768  | 9.349221 |      |         |         |        | 41.4841  | Japan | 74.74 | Japan |
| 14 | Japan | 1977 | 6344  | 8.158704 |      |         |         |        | 40.43694 | Japan | 75.31 | Japan |
| 14 | Japan | 1978 | 7084  | 4.210798 |      |         |         |        | 40.69216 | Japan | 75.64 | Japan |
| 14 | Japan | 1979 | 8027  | 3.730788 |      |         |         |        | 40.60047 | Japan | 76.15 | Japan |
| 14 | Japan | 1980 | 8931  | 7.778707 |      |         |         |        | 41.00015 | Japan | 76.12 | Japan |
| 14 | Japan | 1981 | 9986  | 4.911308 | 39.9 | 0.31988 | 0.41958 | 34.986 | 40.91642 | Japan | 76.54 | Japan |
| 14 | Japan | 1982 | 10813 | 2.736976 |      |         |         |        | 40.32062 | Japan | 77.05 | Japan |
| 14 | Japan | 1983 | 11346 | 1.882329 |      |         |         |        | 39.47266 | Japan | 77.09 | Japan |
| 14 | Japan | 1984 | 12064 | 2.27158  |      |         |         |        | 39.83451 | Japan | 77.49 | Japan |
| 14 | Japan | 1985 | 12978 | 2.023692 |      |         |         |        | 39.59441 | Japan | 77.78 | Japan |
| 14 | Japan | 1986 | 13590 | 0.619255 |      |         |         |        | 39.01246 | Japan | 78.2  | Japan |
| 14 | Japan | 1987 | 14425 | 0.125012 |      |         |         |        | 38.94236 | Japan | 78.61 | Japan |
| 14 | Japan | 1988 | 15862 | 0.672301 |      |         |         |        | 39.11177 | Japan | 78.53 | Japan |
| 14 | Japan | 1989 | 17269 | 2.280099 |      |         |         |        | 39.04401 | Japan | 78.96 | Japan |
| 14 | Japan | 1990 | 18815 | 3.059416 |      |         |         |        | 39.36253 | Japan | 78.97 | Japan |
| 14 | Japan | 1991 | 20055 | 3.240112 |      |         |         |        | 39.02355 | Japan | 79.24 | Japan |
| 14 | Japan | 1992 | 20648 | 1.72701  |      |         |         |        | 37.85884 | Japan | 79.28 | Japan |
| 14 | Japan | 1993 | 21122 | 1.28404  |      |         |         |        | 36.38006 | Japan | 79.43 | Japan |
| 14 | Japan | 1994 | 21757 | 0.706203 |      |         |         |        | 34.92773 | Japan | 79.82 | Japan |
| 14 | Japan | 1995 | 22551 | -0.12673 |      |         |         |        | 34.21719 | Japan | 79.66 | Japan |
| 14 | Japan | 1996 | 23714 | 0.135352 | 46.8 |         |         |        | 33.91785 | Japan | 80.35 | Japan |
| 14 | Japan | 1997 | 24478 | 1.731858 |      |         |         |        | 33.71395 | Japan | 80.56 | Japan |
| 14 | Japan | 1998 | 24429 | 0.656037 |      |         |         |        | 32.70455 | Japan | 80.63 | Japan |
| 14 | Japan | 1999 | 24709 | -0.33826 |      |         |         |        | 32.42955 | Japan | 80.6  | Japan |
| 14 | Japan | 2000 | 26015 | -0.67053 |      |         |         |        | 32.23116 | Japan | 81.19 | Japan |
| 14 | Japan | 2001 | 26619 | -0.73339 | 47.9 |         |         |        | 30.96192 | Japan | 81.53 | Japan |
| 14 | Japan | 2002 | 27196 | -0.91512 |      |         |         |        | 30.39852 | Japan | 81.81 | Japan |
| 14 | Japan | 2003 | 28071 | -0.25419 |      |         |         |        |          | Japan | 81.87 | Japan |

|             |      |       |          |          |      |         |         |          |          |         |              |              |
|-------------|------|-------|----------|----------|------|---------|---------|----------|----------|---------|--------------|--------------|
| 6 France    | 1960 | 1858  | 26.91962 | 25.7     |      |         |         |          | France   | 70.37   | France       |              |
| 6 France    | 1961 | 1959  | 2.414562 | 26.21155 |      |         |         |          | France   | 70.95   | France       |              |
| 6 France    | 1962 | 2099  | 5.24725  | 24.89856 |      |         |         |          | France   | 70.47   | France       |              |
| 6 France    | 1963 | 2205  | 4.93969  | 25.00591 |      |         |         |          | France   | 70.32   | France       |              |
| 6 France    | 1964 | 2367  | 3.229338 | 25.62296 |      |         |         |          | France   | 71.28   | France       |              |
| 6 France    | 1965 | 2526  | 2.71474  | 25.7495  | 25.8 |         |         |          | France   | 71.1    | France       |              |
| 6 France    | 1966 | 2728  | 2.570721 | 26.47594 |      |         |         |          | France   | 71.51   | France       |              |
| 6 France    | 1967 | 2915  | 2.818319 | 26.18846 |      |         |         |          | France   | 71.5    | France       |              |
| 6 France    | 1968 | 3163  | 4.552129 | 26.57132 |      |         |         |          | France   | 71.49   | France       |              |
| 6 France    | 1969 | 3531  | 6.039326 | 28.73958 |      |         |         |          | France   | 71.21   | France       |              |
| 6 France    | 1970 | 3857  | 5.845475 | 31.08583 | 26   |         |         |          | France   | 72.1    | France       |              |
| 6 France    | 1971 | 4203  | 5.397514 | 31.76096 |      |         |         | 38.64927 | France   | 72.07   | France       |              |
| 6 France    | 1972 | 4535  | 6.063004 | 32.39192 |      |         |         | 38.6979  | France   | 72.32   | France       |              |
| 6 France    | 1973 | 5008  | 7.380597 | 34.27934 |      |         |         | 37.94067 | France   | 72.47   | France       |              |
| 6 France    | 1974 | 5594  | 13.64932 | 42.39096 |      |         |         | 37.56777 | France   | 72.81   | France       |              |
| 6 France    | 1975 | 6077  | 11.68593 | 36.92751 | 26.8 |         |         | 37.66209 | France   | 72.9    | France       |              |
| 6 France    | 1976 | 6673  | 9.625493 | 39.89237 |      |         |         | 37.49077 | France   | 73.14   | France       |              |
| 6 France    | 1977 | 7292  | 9.494556 | 40.84986 |      |         |         | 36.88102 | France   | 73.73   | France       |              |
| 6 France    | 1978 | 8031  | 9.250559 | 39.48853 |      |         |         | 36.23006 | France   | 73.85   | France       |              |
| 6 France    | 1979 | 8948  | 10.64674 | 41.87905 |      |         |         | 35.84073 | France   | 74.13   | France       |              |
| 6 France    | 1980 | 9891  | 13.53911 | 44.26932 | 34.5 | 0.27806 | 0.3287  | 27.236   | 36.0303  | France  | 74.24        | France       |
| 6 France    | 1981 | 10929 | 13.33333 | 46.10194 |      |         |         | 35.17299 | France   | 74.4    | France       |              |
| 6 France    | 1982 | 11869 | 11.97848 | 45.5013  |      |         |         | 34.09864 | France   | 74.77   | France       |              |
| 6 France    | 1983 | 12518 | 9.459548 | 45.12784 |      |         |         | 33.51458 | France   | 74.74   | France       |              |
| 6 France    | 1984 | 13145 | 7.673803 | 47.64643 |      |         |         | 33.12116 | France   | 75.23   | France       |              |
| 6 France    | 1985 | 13746 | 5.831099 | 47.15918 | 36.3 |         |         | 32.78713 | France   | 75.31   | France       |              |
| 6 France    | 1986 | 14308 | 2.538527 | 41.34467 |      |         |         | 31.80395 | France   | 75.58   | France       |              |
| 6 France    | 1987 | 14940 | 3.288898 | 41.14437 |      |         |         | 30.94018 | France   | 76.15   | France       |              |
| 6 France    | 1988 | 16040 | 2.700817 | 42.52645 |      |         |         | 30.74395 | France   | 76.4    | France       |              |
| 6 France    | 1989 | 17193 | 3.498302 | 45.68644 |      |         |         | 30.22196 | France   | 76.55   | France       |              |
| 6 France    | 1990 | 18244 | 3.380057 | 45.13057 | 36.9 |         |         | 29.69998 | France   | 76.84   | France       |              |
| 6 France    | 1991 | 19021 | 3.216935 | 45.04747 |      |         |         | 29.52016 | France   | 77.02   | France       |              |
| 6 France    | 1992 | 19746 | 2.365765 | 44.02612 |      |         |         | 29.15713 | France   | 77.3    | France       |              |
| 6 France    | 1993 | 19920 | 2.10601  | 41.84121 |      |         |         | 27.45125 | France   | 77.36   | France       |              |
| 6 France    | 1994 | 20695 | 1.660873 | 43.40138 |      |         |         | 27.18095 | France   | 77.78   | France       |              |
| 6 France    | 1995 | 21545 | 1.778116 | 44.69141 | 37.3 |         |         | 27.2759  | France   | 77.88   | France       |              |
| 6 France    | 1996 | 22288 | 2.008362 | 45.60446 |      |         |         | 26.60661 | France   | 78.07   | France       |              |
| 6 France    | 1997 | 23370 | 1.200322 | 49.3604  |      |         |         | 26.04123 | France   | 78.43   | France       |              |
| 6 France    | 1998 | 24412 | 0.672597 |          |      |         |         | 25.94564 | France   | 78.6    | France       |              |
| 6 France    | 1999 | 25111 | 0.5      |          |      |         |         | 25.49264 | France   | 78.76   | France       |              |
| 6 France    | 2000 | 26690 | 1.691542 |          | 37.3 |         |         | 25.48119 | France   | 79.06   | France       |              |
| 6 France    | 2001 | 28043 | 1.663405 |          |      |         |         | 25.5017  | France   | 79.23   | France       |              |
| 6 France    | 2002 | 28829 | 1.924928 |          |      |         |         | 25.30812 | France   | 79.43   | France       |              |
| 6 France    | 2003 | 29210 | 2.101039 |          |      |         |         | 24.47357 | France   | 79.43   | France       |              |
| 7 West Gern | 1960 | 2284  | 35.45968 | 61       |      |         |         | 44.98724 | Germany  | 69.3    | West Germany |              |
| 7 West Gern | 1961 | 2388  | 2.515723 | 33.83678 |      |         |         |          | Germany  | 69.82   | West Germany |              |
| 7 West Gern | 1962 | 2527  | 2.760736 | 33.46638 |      |         |         |          | Germany  | 70.06   | West Germany |              |
| 7 West Gern | 1963 | 2610  | 2.985075 | 34.16063 |      |         |         |          | Germany  | 70.01   | West Germany |              |
| 7 West Gern | 1964 | 2806  | 2.318841 | 34.56614 |      |         |         |          | Germany  | 70.69   | West Germany |              |
| 7 West Gern | 1965 | 3005  | 3.399433 | 35.8168  | 58.9 |         |         |          | Germany  | 70.63   | West Germany |              |
| 7 West Gern | 1966 | 3168  | 3.561644 | 36.62823 |      |         |         |          | Germany  | 70.67   | West Germany |              |
| 7 West Gern | 1967 | 3241  | 1.587302 | 37.22666 |      |         |         |          | Germany  | 70.91   | West Germany |              |
| 7 West Gern | 1968 | 3571  | 1.041667 | 39.09016 |      |         |         |          | Germany  | 70.56   | West Germany |              |
| 7 West Gern | 1969 | 3998  | 2.061856 | 40.57124 |      |         |         |          | Germany  | 70.39   | West Germany |              |
| 7 West Gern | 1970 | 4367  | 3.282828 | 40.31838 | 57   |         |         | 38.21701 | Germany  | 70.63   | West Germany |              |
| 7 West Gern | 1971 | 4686  | 5.134474 | 39.73991 |      |         |         | 48.00126 | Germany  | 70.8    | West Germany |              |
| 7 West Gern | 1972 | 5055  | 5.348837 | 39.23    |      |         |         | 46.94689 | Germany  | 71.04   | West Germany |              |
| 7 West Gern | 1973 | 5553  | 6.843267 | 40.75988 |      |         |         | 46.53436 | Germany  | 71.27   | West Germany |              |
| 7 West Gern | 1974 | 6074  | 6.818182 | 48.39369 |      |         |         | 45.70887 | Germany  | 71.62   | West Germany |              |
| 7 West Gern | 1975 | 6603  | 5.996131 | 46.45783 | 46.8 |         |         | 43.37009 | Germany  | 71.53   | West Germany |              |
| 7 West Gern | 1976 | 7367  | 4.379562 | 49.10308 |      |         |         | 43.61361 | Germany  | 72.03   | West Germany |              |
| 7 West Gern | 1977 | 8090  | 3.496504 | 48.56479 |      |         |         | 43.16602 | Germany  | 72.72   | West Germany |              |
| 7 West Gern | 1978 | 8928  | 2.533784 | 47.07179 |      |         |         | 42.96508 | Germany  | 72.73   | West Germany |              |
| 7 West Gern | 1979 | 10067 | 3.789127 | 49.48575 |      |         |         | 43.08099 | Germany  | 73.19   | West Germany |              |
| 7 West Gern | 1980 | 11083 | 5.238095 | 53.33619 | 52.5 | 0.33738 | 0.32564 | 27.018   | 36.04203 | Germany | 73.44        | West Germany |
| 7 West Gern | 1981 | 12115 | 6.334842 | 56.67342 |      |         |         | 35.42349 | Germany  | 73.67   | West Germany |              |
| 7 West Gern | 1982 | 12761 | 5.390071 | 57.34184 |      |         |         | 34.77847 | Germany  | 74      | West Germany |              |
| 7 West Gern | 1983 | 13519 | 3.230148 | 55.48264 |      |         |         | 35.08514 | Germany  | 74.26   | West Germany |              |
| 7 West Gern | 1984 | 14481 | 2.346806 | 58.79181 |      |         |         | 34.51585 | Germany  | 74.84   | West Germany |              |
| 7 West Gern | 1985 | 15291 | 2.038217 | 61.51943 | 58.5 |         |         | 34.85139 | Germany  | 75      | West Germany |              |
| 7 West Gern | 1986 | 15998 | -0.24969 | 55.11741 |      |         |         | 34.36679 | Germany  | 75.25   | West Germany |              |
| 7 West Gern | 1987 | 16679 | 0.125156 | 52.91488 |      |         |         | 34.09019 | Germany  | 75.66   | West Germany |              |
| 7 West Gern | 1988 | 17786 | 1.125    | 53.91034 |      |         |         | 33.77234 | Germany  | 75.88   | West Germany |              |
| 7 West Gern | 1989 | 18994 | 2.843016 | 57.66485 |      |         |         | 33.96273 | Germany  | 76      | West Germany |              |
| 7 West Gern | 1990 | 20465 | 2.764423 | 58.3615  | 56.2 |         |         |          | Germany  | 76      | West Germany |              |
| 7 West Gern | 1991 | 21602 | 3.74269  |          |      |         |         |          | Germany  | 76.18   | West Germany |              |
| 7 West Gern | 1992 | 22154 | 4.058625 |          |      |         |         |          | Germany  | 76.56   | West Germany |              |
| 7 West Gern | 1993 | 21878 | 3.68364  |          |      |         |         |          | Germany  | 76.54   | West Germany |              |
| 7 West Gern | 1994 | 22371 | 2.821317 |          |      |         |         |          | Germany  | 76.83   | West Germany |              |
| 7 West Gern | 1995 | 23035 | 1.626016 |          |      |         |         |          | Germany  | 76.94   | West Germany |              |
| 7 West Gern | 1996 | 23742 | 1.3      |          |      |         |         |          | Germany  | 77.11   | West Germany |              |
| 7 West Gern | 1997 | 24156 | 1.7769   |          |      |         |         |          | Germany  | 77.49   | West Germany |              |
| 7 West Gern | 1998 | 24931 | 0.872939 |          |      |         |         |          | Germany  | 77.8    | West Germany |              |
| 7 West Gern | 1999 | 25755 | 0.673077 |          |      |         |         |          | Germany  | 77.98   | West Germany |              |
| 7 West Gern | 2000 | 26943 |          |          |      |         |         |          | Germany  | 78.24   | West Germany |              |
| 7 West Gern | 2001 | 27449 |          |          |      |         |         |          | Germany  | 78.56   | West Germany |              |
| 7 West Gern | 2002 | 28348 |          |          |      |         |         |          | Germany  | 78.64   | West Germany |              |
| 7 West Gern | 2003 | 28855 |          |          |      |         |         |          | Germany  | 78.68   | West Germany |              |

|   |         |      |       |          |          |      |         |         |        |          |         |       |         |
|---|---------|------|-------|----------|----------|------|---------|---------|--------|----------|---------|-------|---------|
| 4 | Belgium | 1960 | 1782  |          | 77.34178 | 27.1 |         |         |        |          | Belgium | 69.63 | Belgium |
| 4 | Belgium | 1961 | 1883  | 0.983146 | 80.01627 |      |         |         |        |          | Belgium | 70.5  | Belgium |
| 4 | Belgium | 1962 | 2018  | 1.404729 | 82.43776 |      |         |         |        |          | Belgium | 70.23 | Belgium |
| 4 | Belgium | 1963 | 2122  | 2.15334  | 85.66539 |      |         |         |        |          | Belgium | 70.04 | Belgium |
| 4 | Belgium | 1964 | 2288  | 4.175618 | 86.62045 |      |         |         |        |          | Belgium | 70.71 | Belgium |
| 4 | Belgium | 1965 | 2414  | 4.059802 | 85.26191 | 28.5 |         |         |        |          | Belgium | 70.56 | Belgium |
| 4 | Belgium | 1966 | 2559  | 4.173892 | 89.37012 |      |         |         |        |          | Belgium | 70.63 | Belgium |
| 4 | Belgium | 1967 | 2719  | 2.912852 | 86.23965 |      |         |         |        |          | Belgium | 70.92 | Belgium |
| 4 | Belgium | 1968 | 2958  | 2.703327 | 90.62302 |      |         |         |        |          | Belgium | 70.61 | Belgium |
| 4 | Belgium | 1969 | 3308  | 3.745782 | 97.94964 |      |         |         |        |          | Belgium | 70.68 | Belgium |
| 4 | Belgium | 1970 | 3797  | 3.914128 | 100.4281 | 28.7 |         |         |        |          | Belgium | 70.95 | Belgium |
| 4 | Belgium | 1971 | 4129  | 4.340568 | 97.9751  |      |         |         |        | 42.50227 | Belgium | 71.08 | Belgium |
| 4 | Belgium | 1972 | 4512  | 5.4475   | 97.54892 |      |         |         |        | 41.94415 | Belgium | 71.42 | Belgium |
| 4 | Belgium | 1973 | 5039  | 6.955278 | 107.7751 |      |         |         |        | 42.51509 | Belgium | 71.63 | Belgium |
| 4 | Belgium | 1974 | 5707  | 12.67789 | 120.5175 |      |         |         |        | 43.29301 | Belgium | 71.98 | Belgium |
| 4 | Belgium | 1975 | 6146  | 12.7682  | 104.7795 | 30.3 |         |         |        | 40.01701 | Belgium | 71.97 | Belgium |
| 4 | Belgium | 1976 | 6854  | 9.1587   | 110.8381 |      |         |         |        | 40.13395 | Belgium | 72.12 | Belgium |
| 4 | Belgium | 1977 | 7326  | 7.110848 | 109.5376 |      |         |         |        | 39.49528 | Belgium | 72.76 | Belgium |
| 4 | Belgium | 1978 | 8056  | 4.470595 | 105.6856 |      |         |         |        | 38.45702 | Belgium | 72.71 | Belgium |
| 4 | Belgium | 1979 | 8921  | 4.469084 | 116.2898 |      |         |         |        | 38.20924 | Belgium | 73.21 | Belgium |
| 4 | Belgium | 1980 | 10156 | 6.650975 | 117.1688 | 31.6 | 0.26864 | 0.28246 | 21.876 | 36.84375 | Belgium | 73.25 | Belgium |
| 4 | Belgium | 1981 | 11079 | 7.628274 | 126.3526 |      |         |         |        | 34.46517 | Belgium | 73.66 | Belgium |
| 4 | Belgium | 1982 | 11827 | 8.725851 | 134.4237 |      |         |         |        | 34.4062  | Belgium | 73.88 | Belgium |
| 4 | Belgium | 1983 | 12334 | 7.66337  | 137.1891 |      |         |         |        | 34.14059 | Belgium | 73.89 | Belgium |
| 4 | Belgium | 1984 | 13113 | 6.347517 | 146.6429 |      |         |         |        | 33.48085 | Belgium | 74.37 | Belgium |
| 4 | Belgium | 1985 | 13735 | 4.867676 | 140.5551 | 32.6 |         |         |        | 34.2135  | Belgium | 74.48 | Belgium |
| 4 | Belgium | 1986 | 14292 | 1.295501 | 126.711  |      |         |         |        | 33.22915 | Belgium | 74.68 | Belgium |
| 4 | Belgium | 1987 | 15013 | 1.554483 | 122.6466 |      |         |         |        | 32.1018  | Belgium | 75.29 | Belgium |
| 4 | Belgium | 1988 | 16209 | 1.162051 | 129.2056 |      |         |         |        | 32.88089 | Belgium | 75.6  | Belgium |
| 4 | Belgium | 1989 | 17345 | 3.10545  | 138.3847 |      |         |         |        | 33.22943 | Belgium | 75.66 | Belgium |
| 4 | Belgium | 1990 | 18526 | 3.452823 | 134.0066 | 32.6 |         |         |        | 32.6643  | Belgium | 76.07 | Belgium |
| 4 | Belgium | 1991 | 19453 | 3.208552 | 130.8264 |      |         |         |        | 30.66162 | Belgium | 76.21 | Belgium |
| 4 | Belgium | 1992 | 20123 | 2.429914 | 126.436  |      |         |         |        | 30.11093 | Belgium | 76.37 | Belgium |
| 4 | Belgium | 1993 | 20308 | 2.753963 | 120.238  |      |         |         |        | 28.99867 | Belgium | 76.38 | Belgium |
| 4 | Belgium | 1994 | 21340 | 2.377799 | 125.5379 |      |         |         |        | 28.92364 | Belgium | 76.72 | Belgium |
| 4 | Belgium | 1995 | 22248 | 1.466814 | 129.3607 | 30.5 |         |         |        | 29.53443 | Belgium | 76.85 | Belgium |
| 4 | Belgium | 1996 | 22687 | 2.058919 | 131.875  |      |         |         |        | 29.14131 | Belgium | 77.2  | Belgium |
| 4 | Belgium | 1997 | 23416 | 1.627459 | 141.3144 |      |         |         |        | 29.25781 | Belgium | 77.41 | Belgium |
| 4 | Belgium | 1998 | 24164 | 0.953623 | 149.6824 |      |         |         |        | 28.63953 | Belgium | 77.49 | Belgium |
| 4 | Belgium | 1999 | 24792 | 1.119242 |          |      |         |         |        | 27.95392 | Belgium | 77.66 | Belgium |
| 4 | Belgium | 2000 | 26631 | 2.546246 |          | 28   |         |         |        | 28.08952 | Belgium | 77.78 | Belgium |
| 4 | Belgium | 2001 | 28001 | 2.471273 |          |      |         |         |        | 27.25738 | Belgium | 78.09 | Belgium |
| 4 | Belgium | 2002 | 29330 | 1.643454 |          |      |         |         |        | 27.01092 | Belgium | 78.18 | Belgium |
| 4 | Belgium | 2003 | 30082 | 1.591312 |          |      |         |         |        | 26.48478 | Belgium | 78.34 | Belgium |
| 5 | Denmark | 1960 | 2329  |          | 65.7822  | 46.1 |         |         |        |          | Denmark | 72.2  | Denmark |
| 5 | Denmark | 1961 | 2485  | 3.451629 | 61.54067 |      |         |         |        |          | Denmark | 72.45 | Denmark |
| 5 | Denmark | 1962 | 2665  | 7.37782  | 60.33738 |      |         |         |        |          | Denmark | 72.34 | Denmark |
| 5 | Denmark | 1963 | 2700  | 6.105033 | 60.41604 |      |         |         |        |          | Denmark | 72.42 | Denmark |
| 5 | Denmark | 1964 | 2980  | 3.092783 | 61.6781  |      |         |         |        |          | Denmark | 72.51 | Denmark |
| 5 | Denmark | 1965 | 3177  | 5.45     | 61.38874 | 45.5 |         |         |        |          | Denmark | 72.39 | Denmark |
| 5 | Denmark | 1966 | 3377  | 7.06496  | 59.87274 |      |         |         |        |          | Denmark | 72.46 | Denmark |
| 5 | Denmark | 1967 | 3580  | 8.207853 | 57.85473 |      |         |         |        |          | Denmark | 72.94 | Denmark |
| 5 | Denmark | 1968 | 3892  | 7.953615 | 57.87989 |      |         |         |        |          | Denmark | 73.15 | Denmark |
| 5 | Denmark | 1969 | 4352  | 3.487931 | 58.46833 |      |         |         |        |          | Denmark | 73.24 | Denmark |
| 5 | Denmark | 1970 | 4541  | 6.514837 | 60.32181 | 44.5 |         |         |        |          | Denmark | 73.37 | Denmark |
| 5 | Denmark | 1971 | 4858  | 5.869877 | 58.49475 |      |         |         |        | 31.78034 | Denmark | 73.43 | Denmark |
| 5 | Denmark | 1972 | 5262  | 6.562348 | 54.94262 |      |         |         |        | 31.53147 | Denmark | 73.45 | Denmark |
| 5 | Denmark | 1973 | 5719  | 9.303389 | 60.4651  |      |         |         |        | 30.28473 | Denmark | 73.69 | Denmark |
| 5 | Denmark | 1974 | 6121  | 15.2752  | 68.13898 |      |         |         |        | 29.58704 | Denmark | 73.82 | Denmark |
| 5 | Denmark | 1975 | 6565  | 9.605614 | 62.65065 | 44.9 |         |         |        | 29.25056 | Denmark | 74.09 | Denmark |
| 5 | Denmark | 1976 | 7371  | 9        | 63.9493  |      |         |         |        | 28.24987 | Denmark | 73.76 | Denmark |
| 5 | Denmark | 1977 | 7901  | 11.13914 | 62.84295 |      |         |         |        | 28.02203 | Denmark | 74.66 | Denmark |
| 5 | Denmark | 1978 | 8585  | 10.00894 | 59.20886 |      |         |         |        | 27.56307 | Denmark | 74.42 | Denmark |
| 5 | Denmark | 1979 | 9566  | 9.611055 | 62.88595 |      |         |         |        | 26.88064 | Denmark | 74.24 | Denmark |
| 5 | Denmark | 1980 | 10362 | 12.30532 | 68.16064 | 43.4 | 0.29344 | 0.33284 | 22.218 | 28.23314 | Denmark | 74.13 | Denmark |
| 5 | Denmark | 1981 | 11106 | 11.79159 | 74.18737 |      |         |         |        | 26.5771  | Denmark | 74.25 | Denmark |
| 5 | Denmark | 1982 | 12115 | 10.08994 | 74.13429 |      |         |         |        | 26.75725 | Denmark | 74.59 | Denmark |
| 5 | Denmark | 1983 | 12822 | 6.907309 | 72.48873 |      |         |         |        | 26.98976 | Denmark | 74.46 | Denmark |
| 5 | Denmark | 1984 | 13777 | 6.322079 | 73.97858 |      |         |         |        | 27.29058 | Denmark | 74.61 | Denmark |
| 5 | Denmark | 1985 | 14698 | 4.652379 | 74.85047 | 42.5 |         |         |        | 27.62063 | Denmark | 74.48 | Denmark |
| 5 | Denmark | 1986 | 15608 | 3.721279 | 66.16891 |      |         |         |        | 28.24608 | Denmark | 74.63 | Denmark |
| 5 | Denmark | 1987 | 16024 | 3.985071 | 62.58148 |      |         |         |        | 27.91802 | Denmark | 74.74 | Denmark |
| 5 | Denmark | 1988 | 16766 | 4.550191 | 63.53234 |      |         |         |        | 27.08609 | Denmark | 74.84 | Denmark |
| 5 | Denmark | 1989 | 17418 | 4.784053 | 67.06669 |      |         |         |        | 27.02068 | Denmark | 74.86 | Denmark |
| 5 | Denmark | 1990 | 18237 | 2.652716 | 66.58468 | 49.9 |         |         |        | 26.54429 | Denmark | 74.86 | Denmark |
| 5 | Denmark | 1991 | 19070 | 2.36796  | 68.53211 |      |         |         |        | 26.16956 | Denmark | 75.23 | Denmark |
| 5 | Denmark | 1992 | 19829 | 2.101981 | 66.43089 |      |         |         |        | 26.34534 | Denmark | 75.26 | Denmark |
| 5 | Denmark | 1993 | 20199 | 1.250985 | 63.97609 |      |         |         |        | 25.19012 | Denmark | 75.18 | Denmark |
| 5 | Denmark | 1994 | 21691 | 1.994357 | 65.61267 |      |         |         |        | 25.31154 | Denmark | 75.44 | Denmark |
| 5 | Denmark | 1995 | 22693 | 2.098436 | 66.71786 | 47   |         |         |        | 25.75751 | Denmark | 75.28 | Denmark |
| 5 | Denmark | 1996 | 23781 | 2.11136  | 66.07381 |      |         |         |        | 25.95113 | Denmark | 75.66 | Denmark |
| 5 | Denmark | 1997 | 24878 | 2.195791 | 68.58707 |      |         |         |        | 26.04515 | Denmark | 76.03 | Denmark |
| 5 | Denmark | 1998 | 25669 | 1.853178 |          |      |         |         |        | 26.00064 | Denmark | 76.44 | Denmark |
| 5 | Denmark | 1999 | 27113 | 2.478685 |          |      |         |         |        | 26.2223  | Denmark | 76.58 | Denmark |
| 5 | Denmark | 2000 | 28798 | 2.924779 |          | 46.5 |         |         |        | 27.18491 | Denmark | 76.81 | Denmark |
| 5 | Denmark | 2001 | 29837 | 2.35     |          |      |         |         |        | 26.28203 | Denmark | 76.97 | Denmark |
| 5 | Denmark | 2002 | 30318 | 2.426315 |          |      |         |         |        | 26.40067 | Denmark | 77.09 | Denmark |
| 5 | Denmark | 2003 | 30853 | 2.09062  |          |      |         |         |        | 26.40539 | Denmark | 77.69 | Denmark |

|    |           |      |       |          |          |      |         |         |        |          |           |       |           |
|----|-----------|------|-------|----------|----------|------|---------|---------|--------|----------|-----------|-------|-----------|
| 20 | Australia | 1960 | 2373  |          | 31.26644 | 50.4 |         |         |        |          | Australia | 70.87 | Australia |
| 20 | Australia | 1961 | 2346  | 2.512132 | 29.82107 |      |         |         |        |          | Australia | 71.13 | Australia |
| 20 | Australia | 1962 | 2539  | -0.27847 | 30.15854 |      |         |         |        |          | Australia | 70.9  | Australia |
| 20 | Australia | 1963 | 2717  | 0.530578 | 32.0554  |      |         |         |        |          | Australia | 70.96 | Australia |
| 20 | Australia | 1964 | 2873  | 2.361111 | 31.52728 |      |         |         |        |          | Australia | 70.57 | Australia |
| 20 | Australia | 1965 | 2973  | 3.962008 | 31.0356  | 48.9 |         |         |        |          | Australia | 70.8  | Australia |
| 20 | Australia | 1966 | 3230  | 2.975724 | 29.97315 |      |         |         |        |          | Australia | 70.68 | Australia |
| 20 | Australia | 1967 | 3404  | 3.193916 | 30.11419 |      |         |         |        |          | Australia | 71.04 | Australia |
| 20 | Australia | 1968 | 3788  | 2.652911 | 28.34859 |      |         |         |        |          | Australia | 70.69 | Australia |
| 20 | Australia | 1969 | 4162  | 2.919359 | 29.82114 |      |         |         |        |          | Australia | 71.06 | Australia |
| 20 | Australia | 1970 | 4490  | 3.906068 | 28.96243 | 48.3 |         |         |        |          | Australia | 70.66 | Australia |
| 20 | Australia | 1971 | 4677  | 6.063996 | 27.80747 |      |         |         |        | 37.29359 | Australia | 71.43 | Australia |
| 20 | Australia | 1972 | 5013  | 5.864979 | 27.70299 |      |         |         |        | 36.80088 | Australia | 71.77 | Australia |
| 20 | Australia | 1973 | 5595  | 9.465922 | 29.4404  |      |         |         |        | 35.43585 | Australia | 72.06 | Australia |
| 20 | Australia | 1974 | 6024  | 15.11014 | 31.63861 |      |         |         |        | 36.88676 | Australia | 71.85 | Australia |
| 20 | Australia | 1975 | 6683  | 15.07196 | 28.90041 | 47   |         |         |        | 37.10455 | Australia | 72.78 | Australia |
| 20 | Australia | 1976 | 7140  | 13.52391 | 31.20762 |      |         |         |        | 36.66529 | Australia | 72.79 | Australia |
| 20 | Australia | 1977 | 7482  | 12.30024 | 30.8631  |      |         |         |        | 35.99936 | Australia | 73.47 | Australia |
| 20 | Australia | 1978 | 8272  | 7.923674 | 32.15132 |      |         |         |        | 35.65282 | Australia | 73.74 | Australia |
| 20 | Australia | 1979 | 9174  | 9.090001 | 34.95831 |      |         |         |        | 35.81057 | Australia | 74.33 | Australia |
| 20 | Australia | 1980 | 10203 | 10.12658 | 33.86125 | 47.5 | 0.3173  | 0.31798 | 29.696 | 37.0267  | Australia | 74.57 | Australia |
| 20 | Australia | 1981 | 11513 | 9.691745 | 33.17373 |      |         |         |        | 35.92434 | Australia | 74.78 | Australia |
| 20 | Australia | 1982 | 11537 | 11.14551 | 31.65774 |      |         |         |        | 34.74367 | Australia | 74.72 | Australia |
| 20 | Australia | 1983 | 12300 | 10.11356 | 30.67814 |      |         |         |        | 34.8257  | Australia | 75.44 | Australia |
| 20 | Australia | 1984 | 13120 | 3.950185 | 34.641   |      |         |         |        | 35.29966 | Australia | 75.51 | Australia |
| 20 | Australia | 1985 | 14019 | 6.739049 | 35.24625 | 48.4 |         |         |        | 35.07288 | Australia | 75.43 | Australia |
| 20 | Australia | 1986 | 14537 | 9.084532 | 34.7444  |      |         |         |        | 32.77786 | Australia | 76.07 | Australia |
| 20 | Australia | 1987 | 15554 | 8.488746 | 34.72344 |      |         |         |        | 31.35881 | Australia | 76.08 | Australia |
| 20 | Australia | 1988 | 16524 | 7.231772 | 34.08369 |      |         |         |        | 29.87518 | Australia | 76.35 | Australia |
| 20 | Australia | 1989 | 17255 | 7.559425 | 34.35854 |      |         |         |        | 29.96091 | Australia | 76.2  | Australia |
| 20 | Australia | 1990 | 17322 | 7.27226  | 34.46177 | 48.4 |         |         |        | 28.9668  | Australia | 77.04 | Australia |
| 20 | Australia | 1991 | 17652 | 3.22268  | 35.23764 |      |         |         |        | 28.168   | Australia | 77.48 | Australia |
| 20 | Australia | 1992 | 18496 | 0.985915 | 37.69257 |      |         |         |        | 27.97166 | Australia | 77.47 | Australia |
| 20 | Australia | 1993 | 19432 | 1.81311  | 38.35179 |      |         |         |        | 28.00918 | Australia | 78.01 | Australia |
| 20 | Australia | 1994 | 20583 | 1.894977 | 39.71843 |      |         |         |        | 28.13992 | Australia | 77.85 | Australia |
| 20 | Australia | 1995 | 21773 | 4.638136 | 40.15326 | 48.6 |         |         |        | 27.82765 | Australia | 78.26 | Australia |
| 20 | Australia | 1996 | 22562 | 2.61242  | 39.97738 |      |         |         |        | 27.10232 | Australia | 78.35 | Australia |
| 20 | Australia | 1997 | 23649 | 0.250417 | 42.1768  |      |         |         |        | 27.07669 | Australia | 78.63 | Australia |
| 20 | Australia | 1998 | 24853 | 0.853455 | 41.36496 |      |         |         |        | 26.28313 | Australia | 79.03 | Australia |
| 20 | Australia | 1999 | 26283 | 1.465428 |          |      |         |         |        | 26.19073 | Australia | 79.29 | Australia |
| 20 | Australia | 2000 | 27403 | 4.475183 |          | 43.6 |         |         |        | 25.56668 | Australia | 79.63 | Australia |
| 20 | Australia | 2001 | 28492 | 4.380841 |          |      |         |         |        | 25.4391  | Australia | 80.03 | Australia |
| 20 | Australia | 2002 | 29819 | 3.003171 |          |      |         |         |        | 25.94952 | Australia | 80.07 | Australia |
| 20 | Australia | 2003 | 31273 | 2.770735 |          |      |         |         |        |          | Australia | 80.47 | Australia |
| 3  | Austria   | 1960 | 1796  |          | 48.12609 | 48.7 |         |         |        |          | Austria   | 68.75 | Austria   |
| 3  | Austria   | 1961 | 1899  | 3.542256 | 46.52596 |      |         |         |        |          | Austria   | 69.72 | Austria   |
| 3  | Austria   | 1962 | 1977  | 4.381785 | 47.17101 |      |         |         |        |          | Austria   | 69.5  | Austria   |
| 3  | Austria   | 1963 | 2074  | 2.70877  | 47.97725 |      |         |         |        |          | Austria   | 69.64 | Austria   |
| 3  | Austria   | 1964 | 2224  | 3.868571 | 48.4151  |      |         |         |        |          | Austria   | 70.13 | Austria   |
| 3  | Austria   | 1965 | 2336  | 4.930911 | 49.6133  | 47.6 |         |         |        |          | Austria   | 69.93 | Austria   |
| 3  | Austria   | 1966 | 2537  | 2.205882 | 50.31641 |      |         |         |        |          | Austria   | 70.24 | Austria   |
| 3  | Austria   | 1967 | 2668  | 3.975    | 49.68385 |      |         |         |        |          | Austria   | 70.12 | Austria   |
| 3  | Austria   | 1968 | 2908  | 2.773103 | 50.41092 |      |         |         |        |          | Austria   | 70.27 | Austria   |
| 3  | Austria   | 1969 | 3239  | 3.080402 | 54.23251 |      |         |         |        |          | Austria   | 70.04 | Austria   |
| 3  | Austria   | 1970 | 3732  | 4.372825 | 59.71196 | 46.5 |         |         |        |          | Austria   | 70.09 | Austria   |
| 3  | Austria   | 1971 | 4100  | 4.704262 | 59.18537 |      |         |         |        | 41.21851 | Austria   | 70.3  | Austria   |
| 3  | Austria   | 1972 | 4513  | 6.362063 | 59.09092 |      |         |         |        | 41.52563 | Austria   | 70.62 | Austria   |
| 3  | Austria   | 1973 | 4969  | 7.524082 | 59.26243 |      |         |         |        | 42.23682 | Austria   | 71.2  | Austria   |
| 3  | Austria   | 1974 | 5622  | 9.521791 | 64.81173 |      |         |         |        | 42.26027 | Austria   | 71.18 | Austria   |
| 3  | Austria   | 1975 | 6147  | 8.445255 | 61.59815 | 45.6 |         |         |        | 40.12814 | Austria   | 71.32 | Austria   |
| 3  | Austria   | 1976 | 6810  | 7.318689 | 65.17087 |      |         |         |        | 39.3979  | Austria   | 71.8  | Austria   |
| 3  | Austria   | 1977 | 7588  | 5.475    | 65.20969 |      |         |         |        | 39.05883 | Austria   | 72.15 | Austria   |
| 3  | Austria   | 1978 | 8117  | 3.579047 | 64.74067 |      |         |         |        | 39.23565 | Austria   | 72.21 | Austria   |
| 3  | Austria   | 1979 | 9288  | 3.707094 | 69.69872 |      |         |         |        | 38.1772  | Austria   | 72.55 | Austria   |
| 3  | Austria   | 1980 | 10312 | 6.32539  | 73.99586 | 61.8 | 0.26338 | 0.31104 | 26.642 | 38.09647 | Austria   | 72.69 | Austria   |
| 3  | Austria   | 1981 | 11242 | 6.806862 | 76.07967 |      |         |         |        | 37.83085 | Austria   | 72.99 | Austria   |
| 3  | Austria   | 1982 | 12148 | 5.440414 | 71.68456 |      |         |         |        | 36.90459 | Austria   | 73.15 | Austria   |
| 3  | Austria   | 1983 | 13048 | 3.335381 | 70.53411 |      |         |         |        | 36.41043 | Austria   | 73.22 | Austria   |
| 3  | Austria   | 1984 | 13533 | 5.664864 | 75.5127  |      |         |         |        | 35.23595 | Austria   | 73.77 | Austria   |
| 3  | Austria   | 1985 | 14296 | 3.189694 | 79.06573 | 60   |         |         |        | 35.58244 | Austria   | 73.99 | Austria   |
| 3  | Austria   | 1986 | 14921 | 1.700921 | 70.92529 |      |         |         |        | 35.29153 | Austria   | 74.46 | Austria   |
| 3  | Austria   | 1987 | 15549 | 1.4      | 69.634   |      |         |         |        | 34.79196 | Austria   | 74.91 | Austria   |
| 3  | Austria   | 1988 | 16595 | 1.931295 | 74.93547 |      |         |         |        | 34.58339 | Austria   | 75.38 | Austria   |
| 3  | Austria   | 1989 | 17768 | 2.563896 | 78.90685 |      |         |         |        | 34.11145 | Austria   | 75.47 | Austria   |
| 3  | Austria   | 1990 | 19070 | 3.262322 | 79.02966 | 57.9 |         |         |        | 34.11053 | Austria   | 75.74 | Austria   |
| 3  | Austria   | 1991 | 20172 | 3.334348 | 78.7691  |      |         |         |        | 33.98061 | Austria   | 75.8  | Austria   |
| 3  | Austria   | 1992 | 20960 | 4.029763 | 76.00291 |      |         |         |        | 33.03325 | Austria   | 76    | Austria   |
| 3  | Austria   | 1993 | 21220 | 3.625806 | 73.35833 |      |         |         |        | 32.18623 | Austria   | 76.23 | Austria   |
| 3  | Austria   | 1994 | 22139 | 2.959065 | 75.14964 |      |         |         |        | 32.13828 | Austria   | 76.55 | Austria   |
| 3  | Austria   | 1995 | 22976 | 2.2501   | 77.78494 | 55.7 |         |         |        | 32.44965 | Austria   | 76.78 | Austria   |
| 3  | Austria   | 1996 | 24008 | 1.843557 | 80.74392 |      |         |         |        | 32.29562 | Austria   | 77.04 | Austria   |
| 3  | Austria   | 1997 | 24472 | 1.325    | 85.25793 |      |         |         |        | 32.72698 | Austria   | 77.43 | Austria   |
| 3  | Austria   | 1998 | 25314 | 0.90468  |          |      |         |         |        | 32.84259 | Austria   | 77.79 | Austria   |
| 3  | Austria   | 1999 | 26558 | 0.562393 |          |      |         |         |        | 32.90003 | Austria   | 77.97 | Austria   |
| 3  | Austria   | 2000 | 28359 | 2.350462 |          | 55   |         |         |        | 32.77485 | Austria   | 78.24 | Austria   |
| 3  | Austria   | 2001 | 28855 | 2.659962 |          |      |         |         |        | 32.1686  | Austria   | 78.73 | Austria   |
| 3  | Austria   | 2002 | 29942 | 1.810212 |          |      |         |         |        | 31.98478 | Austria   | 78.86 | Austria   |
| 3  | Austria   | 2003 | 30796 | 1.363419 |          |      |         |         |        | 31.73713 | Austria   | 78.86 | Austria   |
